# Supplementary material for: Insulin sensitivity is preserved in mice made obese by feeding a high starch diet
Source: eLife. 2022 Nov 17;11:e79250. doi: 10.7554/eLife.79250 (PMC9711519; doi:10.7554/eLife.79250)
Supplement: Figure 1—source data 1. [file elife-79250-fig1-data1.xlsx]

## Sheet: Figure 1A
Figure 1A
Body Weight
Chow
0	1	2	3	4	5	6	7	8	9	10	11	12	13	14	15	16	17	18
22.7	23.7	23.7	24.4	25.2	25.8	25.6	25.4	26.1	25.9	25.9	26	26.6	26.3	26.5	27.3	27	27.2	27.9
19.5	20.7	19.8	20.2	21.3	22.3	22.1	22.5	23.3	23.7	23.8	24.2	24.7	24.8	25.2	26.7	26.4	26.3	26.3
19.8	20.9	21.1	22.1	22.6	23.2	23	24.5	24.9	24.9	24.6	25.7	25.9	25.8	25.6	26.3	26.3	26.8	27.1
22.8	23.9	24.2	25.1	26.5	27.8	27.9	25.5	26	26.4	26.7	26.7	27.3	27.4	27.7	28.5	28.4	28.3	28.9
21.6	23.6	23.8	24.6	25.9	26.6	26.5	28.3	29.9	30.2	29.8	29.5	30.7	30.6	30.6	30.5	31.1	31.8	31.5
22.8	24.1	24.4	25.1	25.5	25.7	25.6	26.1	25.8	26.4	26.7	27	26.7	26.8	27.6	28.8	28.7	29	28.9
24.2	25.2	26	27.3	27.4	28.6	28.6	29.5	29.9	30.5	30	30.2	30.1	31.1	31.2	32.9	32.9	33.9	33.1
20.2	22.5	23.1	23.6	24.1	24.8	24.9	26.5	26.7	27.4	26.7	26.8	27.2	27.5	27.4	27.7	28.7	28.8	29
21.7	22.4	22.9	24	23.7	24.8	25.8	26.4	26.1	27	27.8	28.1	27.9	28.9	29	29.6	29.7	29.8
21.7	22.6	23.1	23.8	24.2	24.2	25.3	25.9	26.1	26.3	26.5	26.4	27	26.5	27.8	28.4	28.7	29	28
21.5	21.6	22.8	23.2	24.4	24.1	24.7	25.5	25.7	25.5	26.4	26.8	27.3	28.2	28	28	28.2	28.3
19.8	21	22.1	22.2	23.6	24.4	24.4	25.3	25.2	25.3	25.6	26.7	26.8	27.8	27.4	28	27.7	27.5	28.4
19.4	20	21.6	21.6	23.6	23.7	24	25.6	26.2	26.6	27.7	28.3	27.8	28	28.2	28.3	28.9	28.8	29.8
20.7	21.3	22.7	22.8	23.9	24.5	24.8	25.4	25.5	25.8	27.2	28.3	27.8	27.9	27.7	28.3	28.7	28.6	29.4
20.8	21.6	23.4	23.9	24.9	25.2	26.1	27.1	28	28.8	30	31	30.2	30.8	30.8	30.5	31.6	31.7	33.2
22.2	22.7	24.4	24.8	25	24.8	25.8	26.5	26.5	27.1	27.7	28.1	28.4	28.4	28.6	29.1	29.3	29.6
20	20.4	21.9	21.8	22.2	22.8	23.1	24.3	25.3	26	25.9	25.9	26.3	26.7	26.2	26.8	26.9	27.2	27.7
21	21.7	22.5	22.6	23.5	23.8	24.3	25.3	25.6	25.9	26.7	27.1	27.2	27.6	28	28.5	28.7	28.2	29.3
21.2	21.7	24.1	24.3	25.2	25.9	26.2	27.8	27.9	28.4	28.6	28.4	28.5	28.7	28.6	29.9	30	30.4	30.2
21.2	21.6	23.7	23.5	24.2	25.2	25.6	26.7	27.3	28.3	28.2	28	28.3	28.9	28.7	29.7	29.7	30	30.1
Hight Starch
0	1	2	3	4	5	6	7	8	9	10	11	12	13	14	15	16	17	18
21.4	22.8	23.5	22.9	24.7	24.7	25.2	25.9	27.6	27.5	27.7	28.2	29.6	29.4	30.8	32.3	31.8	32.4	32.4
19.4	20.8	20.5	20.9	22.4	22.7	23.1	23.7	23.7	24.2	25.5	26.8	27.9	27.7	28.2	29.9	29.2	30.3	28.9
20.1	23.3	24.2	23.6	24.7	24.9	25.5	24.1	25.6	26.3	26.4	27	28.3	27.8	29	30.3	30.2	30.8	30.6
19.4	21.7	22.4	22.7	24.7	25.2	25.8	29.3	29.5	31	32	32.3	33.2	32.8	34.5	33.7	33.4	33.6	36
21.4	25	27.2	26.5	28.6	29.3	30.2	27.3	28.4	30.8	31.7	32.1	33.3	33.1	35.2	35.4	35.5	35.9	37.8
20.4	22.5	24.3	23.2	24.1	25.3	27.2	27.1	27.8	29.1	29.9	31.2	32	32.7	34.3	35.5	35.2	35.8	36.5
21.4	23.3	25.2	24.4	25.6	26.8	27.9	28.3	29	29.7	29.8	30.4	31.6	32.2	34.6	34.8	34.8	35.2	35.9
21.3	22.6	24.1	23.2	24	25	25.9	26.1	26	26.2	27.2	27.8	27.3	28.1	29.1	30.3	29.8	30.4	31
21.2	21.7	22.5	21.9	22.8	23.6	24.3	25	25.1	24.8	26	27	26.9	27.8	29	30.1	30.2	31	31.9
21.3	22.7	24.1	23.4	24.1	25.5	25.7	27	27.3	28.2	28.9	29.7	30.6	31.3	32.8	33.6	32.8	33.7	34.2
21.3	23	25.1	25.4	26.7	27	27.3	30.4	30.7	31.4	32	33.5	34.7	35.2	35.5	26.6	37.8	38
19.2	22.1	25.3	25	26.1	26.3	27.2	30.2	30.3	30.6	30.5	31.4	33.2	34	34.3	35.3	36.5	37.2	38.3
20.8	22.4	24.3	24.1	24	24.5	25.1	28.2	28.3	28.9	28.8	29.3	30.3	31.7	32.2	33.8	34.3	34.4	35.4
20.6	22.6	24.6	24.1	24.7	24.8	25.1	27.2	27.3	27.3	27.3	29.1	29.7	30.2	31.7	31.8	32.5	33.3	34.8
21.5	24.1	26.7	27	28.2	29.1	30	33	32.8	33.6	34.2	35.5	37.5	38.8	39.4	40.6	42.1	43.1	43.8
20.4	23.3	26.6	26.9	27.5	27.9	29.5	30.6	31.5	32.4	31.8	34.1	35.4	36	36.9	37.4	38.1	38.9	40.5
20.7	23.7	27.8	27.9	28.6	28.5	30	32	32.8	34.3	34.4	36.1	37.7	38.7	39.4	39.7	40.7	42	42.4
21.7	23.7	26.3	26.2	26.8	27.2	28.7	29.2	30.4	31.4	30.9	32.9	33.7	34.7	36.1	37.3	38.4	39.8	40.6
21.7	24	26.6	26.4	27.5	27.8	29.2	30	29.9	30.6	31	32.9	34.4	35.4	35.9	36.1	36.6	38	39.1
21.4	23.3	25.7	25.8	26.7	26.7	27.6	29.1	29.8	30.4	30.5	32.4	33.8	34.8	35.2	35.5	36.6	38	39.3
High Fat
0	1	2	3	4	5	6	7	8	9	10	11	12	13	14	15	16	17	18
21	23.1	24.2	24.6	26.2	26.6	26.3	27	27.5	27.7	27.7	28.9	29.8	29.4	30.5	31.5	31.9	32.7	31
20.1	22.8	23.5	23.6	25.3	25.5	25.6	25.7	25.8	26	26.1	28	28.8	28.4	28.9	29.8	29.6	29.8	27.3
19.9	23	24.7	25.1	26.9	27.6	27.8	28.2	28.1	28.3	28	30	30.9	29.5	30.7	32.3	31.9	33	31.8
18.9	23	24.5	24.6	25.8	26.3	26.3	27.3	28.4	29.2	29.9	31	31.9	32.2	31.1	32.8	32	32.6	33.4
19.9	22.2	23.7	23.5	24.6	24.7	24.4	25.4	26	27.4	28	29	30	29.9	29.9	31	30.8	31.4	32.1
20.2	21.5	23.3	22.9	23.8	25.3	25.5	27.5	25.9	26.1	26	27.5	27.7	28	28.8	29.3	28.8	28.8	29.5
20.3	22.8	24.8	24.5	25.5	25.5	25.7	26.6	26.7	27.6	28.3	29.1	29.2	29.2	29.3	31.3	31.1	31.6	32.6
20	22.2	24	23.7	24.7	25.3	25.7	26.6	26.7	27.2	26.1	26.6	27	27.9	28.1	27.8	28.2	28.1	28.5
18.8	21.8	22.9	23.6	25.4	25.6	25.1	26.6	26.8	27.4	27.9	28.5	30.3	30.6	31.2	31.9	33	32.7	32.8
21.2	25.1	27.2	26.8	28.4	29.8	29	30.3	30.3	30.7	30.2	31.7	33.1	33.7	33.4	36.2	36.5	36.3	36.1
22	25.5	27.5	28.7	30.5	29.8	31.6	33.7	34.5	35.8	35.5	38	40	41	42.5	42.9	45	47.2
20.4	22.9	24.1	25.3	25.5	24.8	26.1	28	28.1	29.7	28.9	30.7	31.8	32.1	32.2	32.9	34.1	35.2	35.9
21.7	25.2	26.8	28.4	29.2	29	30.1	32.8	32.3	33.2	32.6	34.4	35.6	35.7	36.4	36.7	38.8	39.5	40.3
21.7	24.1	25.3	26	27	26.3	27.7	29.1	30.3	31.2	30.6	32.4	34.3	34.7	35.2	34.8	36.5	37.8	38.2
21.3	24.3	25.4	26.4	27.5	26.7	27.6	30.3	30.9	32.1	30.7	32.3	33.3	33.9	34.7	35.1	36.7	38	38.2
21.9	24.4	26.5	27	28.6	28.5	29.7	33.6	34.6	35.7	34.5	36.5	38.2	38.6	39.7	39.8	42.2	43.5	45
19.3	22.3	23.4	23.7	24.7	24.8	25.8	28	28.7	29.4	28.8	30.8	33.4	33.8	34.6	34.1	36	36.8	37.9
20.4	23.8	24.8	25.4	26.2	26	26.7	30	31.2	31.6	31	32.9	34.2	35.4	36.2	37.3	38.7	39.8	42
20.6	23.5	25.4	25.9	26.8	27.3	28.4	32	33.4	33.7	33.3	36.4	38.4	39	39.9	39.7	42.2	43.6	45
20.1	23.7	25.3	26.2	27.3	27.3	28.1	31.5	32.2	32.5	31.5	33.2	34.7	35.5	36.1	36	38.6	38.9	40.4

## Sheet: Figure 1B
Figure 1B
Lean mass
Chow
week
4	18.6	15.6	16.3	19.3	18.9	18.2	19.9	17.5	16.9	17.5
6	18.7	16.1	16	17.2	19.4	18.9	20.8	19.2	19.1	18.5
12	19.2	18.7	19	20.6	22.6	19.8	22.5	21.4	21.5	20.2
High Starch
week
4	17.6	15.6	16.1	17.4	20.1	16.3	18	17	15.8	16
6	18	16.9	17	21.4	19.5	17.9	19	17.9	16.8	17.2
12	20	19.6	18.9	24.1	23.3	20.4	21.7	19.2	20.3	18.6
High fat
week
4	16.5	20.2	16.2	15	16.4	17.9	16.1	17.8	16.9	20.5
6	16.4	20.2	16.3	16.5	16.8	21	17	18.3	18.6	21.9
12	18.8	18.7	21.2	18.4	19.6	19.4	22.4	21.4

## Sheet: Figure 1C
fat mass
Chow
Week
4	4.2	3.3	3.6	3.7	3.4	3.2	3.9	3.1	3.7	3.8
6	3.2	2.8	4.6	4.3	4.7	3.6	4.5	3.1	4	3.9
12	3	2.6	3.3	3	3.7	4.6	5.3	4.1	4.4	5.1
High Starch
Week
4	3.5	3.4	5.8	4.5	5.1	4.5	4.8	4.3	4.2	5.6
6	4.2	4.6	4.5	4.7	3.9	5.7	5.3	4.1	4.6	6.7
12	6.3	4.6	6.5	5.3	6.5	9.9	7.6	9.5	5.3	6.7
High Fat
Week
4	6.7	5	5.9	8.4	5.4	3.2	6.7	4.3	5.6	5.3
6	7.2	4.8	5.7	8	5.3	3.5	6.3	4.6	5.4	6
12	8.6	6.7	5.8	12.1	9.1	8.4	3.7	4.1

## Sheet: Figure 1D
Food Intake
Chow
37.9	43.53	39	37.7
Hi-ST
46.7	67.07	58.52	59.42
Hi-F
52.5	55.5	63.98	58.05

## Sheet: Figure 1E
Energy Expenditure
Chow										High Starch													High fat
Time										Time													Time
7:00	1.42683	1.3625	1.53095	1.43288	1.13469	0.891245	1.23523	1.10222		7:00	1.20407	1.30227	0.873352	2.00332	1.42593	0.968249	1.9141	1.976	1.48636	1.38734			7:00	1.04495	0.980405	1.12045	1.36384	1.15659	1.49047	2.05919	1.55317	1.30287	1.63554
	1.67578	0.971508	1.44565	0.983414	1.20933	0.940928	1.4215	1.20131			1.08993	1.26384	0.810302	1.6356	1.41185	0.869544	1.90647	1.87442	1.48044	1.14358				0.806803	0.829445	0.952741	0.953074	1.18858	1.30042	1.69343	1.30964	1.46001	1.52417
	1.72302	0.893016	0.959368	0.846445	0.793447	1.35467	1.15075	0.990581			0.920145	1.40317	0.737073	1.05458	1.02502	1.1084	1.3704	1.56291	1.16131	1.05816				0.725126	0.860674	0.968766	0.955913	1.10862	1.11434	1.03056	1.68461	1.25219	1.43386
9:00	1.21732	0.831728	0.920029	1.08855	0.932468	1.15734	0.85782	0.885237		9:00	0.93697	1.13237	0.7856	1.06412	1.23122	0.925947	1.41169	1.3172	1.18552	0.896545			9:00	0.804791	0.823568	0.884856	0.962851	0.947081	1.12244	0.898766	1.83197	1.23359	1.65214
	0.932387	0.791475	0.924766	1.074	0.936049	0.830157	0.72846	0.790824			0.813243	1.14539	0.710234	1.06552	1.04876	1.1141	1.37333	1.27395	1.11436	0.838438				0.750442	0.836846	0.882824	0.859267	0.86277	0.979608	1.45291	1.06329	0.904198	1.29598
	0.837026	1.00388	1.06586	0.855886	0.765438	0.695205	0.769875	0.844876			1.02902	1.04396	0.903875	1.1044	1.02636	0.991655	1.32295	1.53424	1.13218	0.934392				0.74568	0.820491	0.814422	1.0773	0.930042	1.45115	1.21158	0.95486	1.0114	1.16853
11:00	1.05791	0.894175	0.925207	0.851202	0.903791	0.686926	0.899412	0.843419		11:00	0.876896	1.12479	0.903474	0.929675	0.959756	0.860671	1.66008	1.47542	1.05101	1.11841			11:00	0.900293	0.909736	0.967996	1.10822	0.848961	1.26785	1.01588	0.943014	0.943157	1.24809
	0.802721	0.844693	0.737077	0.806244	1.04697	0.742259	0.720282	0.877289			0.748869	1.19278	0.983571	1.15767	1.08529	1.24603	1.6102	1.56367	1.19194	0.94294				0.876477	0.853073	0.823196	0.995277	0.895329	1.07339	1.5069	1.52921	0.966247	1.36204
	0.881871	1.05699	1.06275	0.902885	0.861738	0.732033	0.73048	0.946763			0.871632	1.12362	0.773052	1.18659	1.01605	0.794943	1.17599	1.39152	1.13856	0.756113				0.885641	0.724276	0.941385	0.802296	0.945362	1.3927	0.995929	1.53272	0.990434	1.20941
13:00	0.9801	0.802707	0.985571	0.843444	0.724813	0.746829	0.746427	0.77801		13:00	0.8971	1.00788	0.666416	1.30726	0.957895	0.933766	1.33291	1.38562	0.918239	0.926449			13:00	0.761197	0.73554	0.934648	1.03737	0.847594	1.17318	0.903378	1.27823	1.04846	1.2358
	1.00803	0.713122	0.928444	1.17849	0.847334	0.630314	0.882228	0.828455			0.987184	1.02398	0.780788	1.04544	0.927481	1.20768	1.85147	1.42051	0.999555	0.805481				0.758061	0.75027	0.89797	0.975269	1.11844	1.16284	0.959826	0.974508	0.871613	1.29131
	0.834812	0.728827	0.883596	0.806808	0.7937	0.749671	0.702494	0.859327			0.82052	1.08532	0.750405	1.19645	0.93519	0.859418	1.14135	1.21002	1.31563	1.23364				0.799925	0.889847	0.889872	1.01837	0.79201	1.11903	1.02149	1.10412	1.24851	1.47821
15:00	0.907778	0.820006	0.80037	1.10372	0.672395	0.653615	0.739607	0.838844		15:00	0.895732	1.15141	0.669461	1.11751	1.24798	0.786219	1.59504	1.44625	1.20736	1.2389			15:00	0.697143	0.901662	0.757346	0.948307	0.855571	1.33832	1.39381	0.890525	0.919111	1.27008
	0.939662	0.771425	0.705752	0.840284	0.956798	0.657002	0.808701	0.854254			1.05522	1.23851	1.03185	1.28237	1.04748	1.14494	1.24895	1.38261	0.922125	0.867171				0.943811	0.820782	1.24278	1.07084	1.04714	1.16968	1.40403	1.51727	1.10551	1.28629
	1.01908	0.92207	0.649055	0.707559	0.701433	0.834495	0.817434	0.820396			1.03216	1.37971	0.886273	1.02313	1.1031	0.888731	1.6356	1.68547	1.42935	1.17308				1.24753	1.15868	1.05877	1.01066	0.902145	1.14807	0.906774	1.10676	1.01528	1.6148
17:00	1.23969	0.819271	0.863482	0.994184	0.857724	0.663628	0.898306	0.967197		17:00	1.24578	1.28212	0.88685	1.3288	1.26938	0.915441	1.89676	1.42538	1.22018	1.09826			17:00	1.05769	1.22583	1.22131	1.10461	1.19661	1.48151	1.48061	0.990372	1.1117	1.41652
	1.16591	1.18181	1.36246	0.778237	0.93459	0.731926	0.914134	0.992263			1.14855	1.40463	1.1962	1.3377	1.6103	1.37763	1.4461	2.04213	1.41235	1.13278				1.06429	0.920223	1.32136	1.3195	1.18368	1.51535	1.05372	1.43466	1.33782	1.83323
	1.12658	0.968673	1.09062	1.19432	1.0579	0.863425	0.994904	1.03858			1.17599	1.27108	1.17118	1.74379	1.50507	1.09741	2.12103	1.66923	1.47411	1.13734				1.17186	1.14225	1.25616	1.3724	1.46843	1.49393	1.4809	1.43433	1.36873	1.66877
19:00	1.14697	1.1983	1.14879	0.950972	1.16597	1.00119	1.24357	1.52277		19:00	1.66203	1.54189	1.48489	1.8456	1.55648	1.47003	1.93363	2.05583	1.41498	1.2822			19:00	1.47722	1.47813	1.63288	1.61301	1.58053	1.77695	1.82407	1.82498	1.32991	1.91597
	1.66768	1.44275	1.73594	1.40212	1.34672	1.13354	1.49059	1.65455			1.8689	1.77744	1.78173	2.23624	1.93333	1.96716	2.41626	2.26531	2.09389	1.81881				1.76905	1.70762	2.00559	1.96827	1.82074	2.13274	2.42138	2.34159	1.8605	2.2287
	1.80468	1.63412	1.83971	1.70888	1.58774	1.4558	1.42982	1.69493			1.81983	1.81503	1.59273	2.19676	1.96001	1.94176	2.62384	2.6258	1.85554	1.8078				1.54825	1.41232	1.67604	1.8053	1.85325	1.83279	2.22151	2.31752	1.71476	2.19814
21:00	1.76931	1.66023	1.92963	1.54897	1.37456	1.40323	1.55249	1.60626		21:00	1.57403	1.7136	1.71805	1.92042	1.81765	1.55606	2.62772	2.28456	1.82154	1.71895			21:00	1.37552	1.12618	1.85261	1.87481	1.38018	1.82325	2.33188	2.27488	1.77098	2.07857
	1.82766	1.66226	1.77594	1.71778	1.4657	1.43086	1.32447	1.60711			1.871	1.51644	1.55429	1.59573	1.78244	1.86879	2.21331	2.01992	1.58922	1.71329				1.19337	1.24676	1.43875	1.7446	1.54439	1.74422	2.21827	2.06575	1.38257	1.86725
	1.6632	1.48213	1.96064	1.54519	1.15126	1.33958	1.16708	1.39308			1.33409	1.63867	1.33481	1.31707	1.57689	1.65801	1.96187	1.80978	1.56375	1.69292				1.08414	1.0222	0.967979	1.29412	1.41618	1.48411	2.19645	1.89894	1.38634	1.57094
23:00	1.65518	1.65669	1.91659	1.3733	1.38049	1.17312	1.09524	1.30144		23:00	1.1978	1.51347	1.15827	1.60431	1.36237	1.54234	2.38927	1.79121	1.98135	1.4774			23:00	1.06345	1.34594	1.18568	1.20461	1.31898	1.61543	1.63173	1.52044	1.26935	1.95601
	1.78553	1.45931	1.8225	1.53469	1.10849	1.05706	1.36111	1.26331			1.35776	1.50131	1.11894	1.50581	1.37229	1.04012	1.72378	1.60434	1.77423	1.22403				1.00523	1.14794	1.31574	1.26779	1.33435	1.72633	1.18622	1.30718	1.49617	1.70499
	1.54161	1.20109	1.49025	1.74797	1.04191	1.31612	1.14882	1.2722			1.40883	1.4119	1.41166	1.52389	1.21843	1.09463	1.84192	1.57448	1.67346	1.28778				1.06051	1.1336	1.23972	1.53363	1.35865	1.49633	1.5815	1.61476	1.24689	1.69115
1:00	1.72108	1.14233	1.29131	1.95493	1.20181	0.985197	1.17956	1.29039		1:00	1.56177	1.52328	1.22737	1.43694	1.38794	1.35334	1.63529	1.55124	1.89711	1.20184			1:00	1.02607	1.2346	1.5551	1.41733	1.07775	1.32847	1.71339	1.78403	1.49096	1.74937
	1.68405	1.21543	1.28609	1.788	1.20692	0.840276	1.15049	1.16773			1.1141	1.58916	1.14751	1.30961	1.36242	1.2391	2.08071	2.02589	1.56244	1.6332				1.19389	1.24191	1.51143	1.26	1.20517	1.59863	1.80746	1.54598	1.44641	1.95564
	1.29763	1.30757	1.39606	1.37464	1.49006	1.02167	1.01219	1.21561			1.201	1.55751	1.57517	1.54408	1.38519	1.20483	1.88634	2.03011	1.45677	1.59932				1.04583	1.15736	1.63827	1.47333	1.31284	1.63983	1.38945	1.92023	1.27396	1.85404
3:00	1.16147	1.04585	1.46739	1.12958	1.24536	0.845297	0.77572	0.984648		3:00	1.22217	1.3392	1.33421	1.55996	1.3658	1.52315	1.92666	1.81583	1.58437	1.20335			3:00	1.38628	1.40724	1.2533	1.40726	1.17345	1.3659	1.50692	1.40235	1.66553	1.99172
	1.23572	1.03776	1.03571	0.998094	0.931467	0.977924	0.893186	1.12766			1.41746	1.52014	1.24277	1.46315	1.27991	1.47936	1.97097	1.45971	1.69538	1.20915				1.38314	1.05138	1.29662	1.47066	1.36924	1.3548	1.51293	1.23081	1.5065	1.75573
	0.995481	1.08314	0.914873	1.61797	0.980745	0.872612	1.16551	1.15198			1.36496	1.33926	1.11222	1.53579	1.32923	1.45878	1.62773	1.5719	1.45212	1.47067				1.24961	1.35681	1.4654	1.50209	1.20599	1.73798	1.37455	1.23815	1.64269	1.72823
5:00	1.23564	1.32658	1.44937	1.71909	1.22693	0.977082	1.11901	1.25535		5:00	1.45441	1.55341	1.49858	2.11784	1.27317	1.38171	1.70556	2.09923	1.90765	1.62789			5:00	1.20538	1.29465	1.44301	1.86402	1.57686	1.92453	1.57793	1.32853	1.63474	1.89036
	1.41214	1.41377	1.78061	1.64778	1.4068	1.19206	1.45184	1.38923			1.5187	1.56075	1.32446	1.75131	1.38556	1.32119	1.9167	2.15475	1.71361	1.51718				1.56463	1.22157	1.69764	1.71814	1.58193	1.6149	1.71435	1.55283	1.42431	2.03907
	1.42444	1.55046	1.47274	1.88974	1.36224	1.11651	1.04901	1.27453			1.14846	1.4702	1.12288	1.73284	1.39156	1.05845	1.7219	1.64436	1.73242	1.44145				1.56859	1.20954	1.16727	1.56401	1.0766	1.57432	1.72423	2.13424	1.21002	1.96895

## Sheet: Figure 1F
24h Energy expenditure
Chow
31.204	27.2651	30.3701	29.9588	25.8705	23.1339	25.0852	27.0884
High Starch
26.1613	25.9862	29.5199	31.2789	28.988	35.0439	36.2693	36.291	31.229	39.8464
High fat
29.2309	32.973	26.8403	35.1875	31.7165	29.4997	42.8119	41.3472	35.0736	30.4108

## Sheet: Figure 1G
Energy expenditure vs Body weight
Body weight	Chow	Hi-ST	Hi-F	Combined
29.0056	31.204			31.204
27.8389	27.2651			27.2651
27.6946	30.3701			30.3701
25.6139	29.9588			29.9588
29.9755	25.8705			25.8705
28.9739	23.1339			23.1339
29.8009	25.0852			25.0852
28.7918	27.0884			27.0884
33.0585			26.1613	26.1613
29.7061			25.9862	25.9862
32.779			29.5199	29.5199
33.9205			31.2789	31.2789
32.4041			28.988	28.988
33.2063			35.0439	35.0439
31.7462			36.2693	36.2693
31.0902			36.291	36.291
34.3942			31.229	31.229
37.325			39.8464	39.8464
31.657		29.2309		29.2309
28.6879		32.973		32.973
30.3585		26.8403		26.8403
37.5904		35.1875		35.1875
36.3794		31.7165		31.7165
34.2707		29.4997		29.4997
39.5079		42.8119		42.8119
40.5991		41.3472		41.3472
32.9458		35.0736		35.0736
33.6047		30.4108		30.4108

## Sheet: Figure 1H
Activity
Chow
175.137	155.183	284.721	175.358	141.34	130.841	147.445	152.575
High Starch
284.676	158.923	193.57	198.89	220.713	109.282	227.545	138.526	322.681	202.631
High Fat
167.153	192.069	152.923	211.763	202.118	195.516	296.684	232.671	161.835	223.62

## Sheet: Figure 1I
RER
Chow											High Starch												High Fat
7:00	0.88402	0.870868	0.912436	0.839959	0.971513	0.961383	0.987738	0.903903			0.792261	0.77194	0.809651	0.823271	0.750089	0.715936	0.837645	0.912268	0.734795	0.749022			0.701084	0.713889	0.713113	0.720565	0.670436	0.715834	0.736521	0.691248	0.738184	0.734947
	0.915659	0.822986	0.903773	0.778831	0.981734	0.957599	1.00297	0.897391			0.792382	0.836838	0.800297	0.731058	0.724831	0.71495	0.86702	0.855608	0.729724	0.706577			0.69517	0.710956	0.709347	0.688957	0.68368	0.705072	0.692493	0.678568	0.726606	0.703216
	0.899122	0.821046	0.863681	0.790813	0.939259	0.994571	0.968647	0.894261			0.753324	0.81875	0.789704	0.720574	0.704744	0.755776	0.865245	0.833081	0.71857	0.726298			0.703074	0.724195	0.729729	0.697935	0.698398	0.691972	0.660423	0.742985	0.718021	0.71681
9:00	0.870735	0.832291	0.880693	0.833694	0.933278	0.970363	0.938632	0.872421			0.79479	0.762703	0.808836	0.752749	0.742211	0.740293	0.832632	0.810621	0.74302	0.714513			0.71702	0.727122	0.717576	0.726804	0.693082	0.722326	0.650322	0.746871	0.717961	0.736849
	0.852389	0.830349	0.870573	0.818127	0.940007	0.937532	0.92054	0.866606			0.760435	0.774129	0.815448	0.758844	0.762808	0.756583	0.859405	0.794624	0.751591	0.702357			0.738652	0.737522	0.723319	0.706347	0.69142	0.707799	0.722178	0.666731	0.700272	0.707851
	0.827741	0.839521	0.865261	0.779737	0.922464	0.929381	0.94253	0.889107			0.778518	0.808926	0.848833	0.754409	0.72762	0.737567	0.886192	0.84764	0.754478	0.740581			0.731878	0.734007	0.723542	0.739698	0.705435	0.783759	0.705293	0.679341	0.751388	0.714181
11:00	0.822413	0.828279	0.827358	0.772594	0.91775	0.922218	0.95627	0.887817			0.786223	0.813156	0.821069	0.710654	0.741594	0.716418	0.833495	0.781529	0.746738	0.743948			0.760851	0.7616	0.728848	0.738233	0.697225	0.729248	0.691504	0.690612	0.731825	0.715877
	0.816789	0.806662	0.790045	0.708151	0.936676	0.924198	0.949058	0.899243			0.75998	0.805062	0.824849	0.734855	0.690326	0.75536	0.879392	0.830605	0.774727	0.757264			0.769763	0.75453	0.71282	0.697439	0.669666	0.674883	0.733761	0.758632	0.739092	0.747024
	0.801072	0.795673	0.829597	0.752358	0.914155	0.920338	0.954347	0.910724			0.818308	0.798968	0.815909	0.767719	0.720132	0.714289	0.838824	0.821466	0.744833	0.729024			0.749136	0.735924	0.73789	0.70191	0.689674	0.739306	0.701985	0.734613	0.742541	0.727325
13:00	0.795708	0.775283	0.822002	0.738965	0.897757	0.885605	0.92962	0.853187			0.800639	0.809291	0.817134	0.769276	0.703152	0.736516	0.81177	0.813501	0.733028	0.778583			0.747422	0.745078	0.745574	0.737028	0.686019	0.725653	0.700709	0.707699	0.764828	0.757407
	0.794178	0.807266	0.811112	0.789884	0.909987	0.875753	0.94555	0.871266			0.79631	0.823694	0.817717	0.728212	0.70498	0.778534	0.903604	0.790679	0.770024	0.761742			0.764264	0.760391	0.743006	0.691516	0.684669	0.693656	0.702551	0.684964	0.756624	0.742495
	0.79534	0.803075	0.803678	0.735975	0.886466	0.889553	0.929155	0.886697			0.818478	0.81055	0.834128	0.773971	0.705161	0.705239	0.782118	0.762758	0.809977	0.830301			0.762357	0.767536	0.738875	0.722614	0.64657	0.719385	0.702466	0.734009	0.785198	0.761297
15:00	0.828586	0.82378	0.843313	0.818847	0.881202	0.888837	0.948813	0.894804			0.843085	0.852139	0.84957	0.808332	0.742503	0.7	0.896069	0.889413	0.793635	0.85551			0.751391	0.762805	0.755797	0.731478	0.697162	0.765447	0.735863	0.705073	0.750503	0.739374
	0.82358	0.764753	0.829198	0.832988	0.926885	0.900514	0.955856	0.891504			0.812392	0.825155	0.854779	0.805233	0.694575	0.788107	0.940457	0.940059	0.750254	0.804673			0.728656	0.693657	0.752782	0.750996	0.730123	0.729514	0.769226	0.771243	0.777027	0.75216
	0.830061	0.783374	0.805538	0.776574	0.905258	0.940385	0.938336	0.8982			0.836938	0.83912	0.835434	0.74217	0.716688	0.722439	0.913214	0.937742	0.776865	0.804559			0.758743	0.730747	0.736598	0.768173	0.711829	0.752531	0.708455	0.715007	0.755916	0.809589
17:00	0.863895	0.796076	0.809723	0.771994	0.869017	0.898858	0.923817	0.861014			0.868458	0.842369	0.869892	0.800359	0.726525	0.741353	0.892274	0.797349	0.802785	0.767002			0.7388	0.737251	0.724068	0.724673	0.683362	0.732962	0.767364	0.722006	0.712529	0.750024
	0.868827	0.835422	0.859626	0.760102	0.903698	0.908582	0.932684	0.899405			0.887558	0.892596	0.895151	0.809157	0.813076	0.797239	0.978101	0.89228	0.842233	0.791411			0.731282	0.709725	0.761878	0.750826	0.700768	0.746221	0.756192	0.807536	0.722202	0.778078
	0.887852	0.858297	0.866455	0.830449	0.944371	0.947212	0.967792	0.915934			0.90913	0.874624	0.88755	0.875403	0.781824	0.794546	0.989559	0.891764	0.852474	0.807046			0.757167	0.73923	0.749593	0.752278	0.743361	0.733432	0.711042	0.711191	0.716858	0.766463
19:00	0.881461	0.865677	0.900031	0.832303	0.961431	0.964352	0.980901	0.96144			0.9164	0.885588	0.882735	0.893671	0.828696	0.825371	0.939632	0.91838	0.858774	0.832148			0.775016	0.765463	0.778882	0.771954	0.732254	0.775542	0.728817	0.713534	0.712858	0.766081
	0.913512	0.916583	0.910439	0.896471	0.971579	0.984819	0.994535	0.952552			0.917784	0.877465	0.907623	0.908311	0.829669	0.8292	0.956041	0.892668	0.887787	0.845101			0.772631	0.767459	0.777819	0.784416	0.750152	0.774996	0.748042	0.764061	0.746491	0.776455
	0.943914	0.934397	0.94588	0.913363	0.987427	1.02175	1.0104	0.961898			0.926502	0.848272	0.909803	0.878099	0.828648	0.880317	0.97623	0.930977	0.84968	0.859702			0.760783	0.736765	0.759518	0.758761	0.733373	0.762712	0.742364	0.764849	0.730404	0.758076
21:00	0.968103	0.953538	0.965231	0.915719	0.992114	1.02114	1.02555	0.961808			0.924436	0.848146	0.931536	0.877685	0.807649	0.833207	0.968929	0.898499	0.861476	0.880321			0.744989	0.716185	0.770825	0.765763	0.698021	0.746469	0.747384	0.761925	0.742804	0.770685
	0.977881	0.959053	0.970831	0.934655	1.00999	1.02422	1.0127	0.972045			0.924264	0.809806	0.898047	0.850958	0.773714	0.846111	0.951517	0.902322	0.862252	0.885505			0.736753	0.72943	0.73382	0.736666	0.731909	0.74956	0.733738	0.752571	0.693432	0.758141
	0.985513	0.95639	0.945699	0.926664	0.99261	1.02991	1.01508	0.951397			0.901918	0.853279	0.911751	0.837026	0.773812	0.804694	0.950947	0.829665	0.864091	0.851063			0.743042	0.71652	0.700062	0.692792	0.700937	0.721766	0.743355	0.745792	0.714949	0.737134
23:00	0.981748	0.948969	0.96123	0.896451	1.00327	1.02189	0.995113	0.931591			0.855504	0.839474	0.875328	0.856259	0.752778	0.779383	0.963266	0.847091	0.845623	0.778297			0.730927	0.726106	0.716715	0.702312	0.697476	0.738532	0.688667	0.705737	0.712037	0.749839
	0.987294	0.925695	0.94729	0.908666	0.976544	1.00795	1.02095	0.924873			0.860498	0.823021	0.853257	0.807028	0.726725	0.746713	0.928091	0.859878	0.816939	0.77972			0.722676	0.706379	0.719111	0.736551	0.702779	0.749678	0.685241	0.711289	0.755082	0.730694
	0.962124	0.91565	0.917749	0.939987	0.966428	1.01151	0.992746	0.919444			0.877565	0.842947	0.887931	0.827849	0.738297	0.738625	0.925626	0.823284	0.838602	0.786412			0.73098	0.732982	0.729541	0.738214	0.702537	0.713542	0.735686	0.743319	0.715535	0.75368
1:00	0.9705	0.90883	0.900077	0.939398	0.982707	0.983804	0.986556	0.936389			0.885037	0.881074	0.866653	0.784602	0.737967	0.760077	0.910377	0.759916	0.81916	0.758339			0.729801	0.736533	0.745217	0.70346	0.658071	0.705645	0.73491	0.752855	0.734538	0.740312
	0.950117	0.901097	0.893745	0.903631	0.974297	0.955093	0.961997	0.912788			0.809539	0.848666	0.875535	0.778965	0.737739	0.758587	0.93283	0.799878	0.819523	0.79944			0.752795	0.737102	0.736166	0.710708	0.68959	0.748861	0.715155	0.726677	0.721088	0.744509
	0.905941	0.884202	0.898668	0.862613	1.00512	0.963551	0.962471	0.931457			0.804742	0.80566	0.897983	0.827424	0.73892	0.754286	0.9293	0.821265	0.782394	0.79537			0.725488	0.7184	0.733169	0.727954	0.691566	0.734851	0.681684	0.743379	0.707219	0.732218
3:00	0.901379	0.864969	0.879271	0.826386	0.977001	0.937399	0.939164	0.909483			0.83	0.796918	0.882565	0.804054	0.725892	0.77833	0.920651	0.813835	0.78865	0.743361			0.768692	0.741738	0.720682	0.717293	0.666396	0.704238	0.69701	0.686805	0.727585	0.756366
	0.887264	0.865966	0.847822	0.82293	0.946904	0.927479	0.945277	0.910857			0.837358	0.808711	0.880549	0.775238	0.721445	0.768047	0.875459	0.771036	0.780726	0.749777			0.765111	0.723483	0.73603	0.727699	0.683254	0.701369	0.71131	0.672995	0.715642	0.718288
	0.86152	0.863201	0.823273	0.896296	0.953065	0.931625	0.974717	0.90389			0.812586	0.76474	0.866122	0.784829	0.70782	0.766377	0.806301	0.782387	0.764478	0.786106			0.73557	0.731825	0.723522	0.748915	0.665134	0.747811	0.695209	0.677321	0.734691	0.729401
5:00	0.846431	0.87417	0.853534	0.885707	0.988497	0.937466	0.964293	0.907601			0.839266	0.791338	0.904861	0.833904	0.716599	0.76711	0.813859	0.864947	0.790564	0.775769			0.718492	0.720771	0.722793	0.752558	0.725419	0.755514	0.704099	0.706807	0.758738	0.749357
	0.86478	0.881301	0.900777	0.890868	0.99873	0.966707	0.982545	0.919458			0.826826	0.780693	0.85728	0.826124	0.771683	0.749428	0.868521	0.895129	0.76859	0.785414			0.765595	0.707709	0.75049	0.729304	0.716852	0.708923	0.716721	0.705171	0.722153	0.750578
	0.88011	0.897212	0.896329	0.884748	0.991242	0.986122	0.971642	0.915977			0.826656	0.812394	0.84793	0.802273	0.752523	0.724162	0.845491	0.874039	0.7386	0.769246			0.752279	0.718704	0.711873	0.721688	0.652934	0.721715	0.710613	0.759113	0.697796	0.753026

## Sheet: Figure 1J
24h average RER
Chow
0.884654	0.861442	0.876443	0.83908	0.951679	0.953602	0.967472	0.910512
High Starch
0.838502	0.824395	0.859262	0.800571	0.745095	0.763366	0.896391	0.846894	0.793546	0.784208
High Fat
0.742731	0.73277	0.735294	0.729847	0.696709	0.731409	0.715788	0.723404	0.731962	0.745439
