# Supplementary material for: Insulin sensitivity is preserved in mice made obese by feeding a high starch diet
Source: eLife. 2022 Nov 17;11:e79250. doi: 10.7554/eLife.79250 (PMC9711519; doi:10.7554/eLife.79250)
Supplement: Figure 2—source data 1. [file elife-79250-fig2-data1.xlsx]

## Sheet: Figure 2A
oGTT 4 weeks
Chow								High Starch								High Fat
0	15	30	45	60	90			0	15	30	45	60	90			0	15	30	45	60	90
9.2	18.5	15.4	11.8	13.4	11.7			9.4	18.9	14.4	10.5	11.2	10.2			11.5	21.9	18.1	16.5	14.4	10.2
10	18.9	14.2	11.3	11.5	10.7			10.7	19.9	14.4	10.3	11.2	10.3			14.1	26.5	20.8	14.9	14.4	13.6
8.8	19.6	14.5	11.1	11.7	10.4			10	17.1	17.1	11.2	11.1	9.1			10.4	19.7	20	17	14.5	11.9
7.3	14.4	11.5	9	9.2	7.3			10	21.4	18.9	12.9	10.7	10.4			11.5	27.6	22.1	18.2	17.1	12.3
8.2	18.4	15.5	12.6	12	10.7			9.9	21.3	18.4	12.5	12.5	12			9.5	25.4	20.4	14.8	13.3	10.4
7.8	16.9	12.3	12.7	11.7	11			6.8	19.2	11.9	9.5	8.8	7.7			9.9	20.5	20.8	16.2	12.4	12.3
6	16.3	12.5	10.9	9.3	7.7			7	16.7	15.4	13	12.2	9.9			8.2	17.8	20.1	17.3	15.1	11.7
7.7	19.5	13.2	10	10.2	10.3			8.7	18.9	14.5	10.8	12.4	11.2			8.6	18.8	18.3	14	12.7	9.8
7.3	15.9	12.5	10.2	9.4	8.7			8.1	21.1	14.1	12	12	10.4			9.4	17	15.9	10.3	10.5	8.2
8.5	18.8	12.2	10.7	10.6	9.3			8.7	17.8	14.2	12	10.8	10.8			6.9	20.5	17.6	13.5	12.5	9.8
8	16.4	11.8	9.2	7.6	9.2			7	21.7	14.9	12	11.3	9.4			7.2	18.9	20.4	16.4	13.5	12.2
8.3	16	16.1	11.4	10.4	12.2			7.5	21.2	11.4	9	9.7	8.2			6.8	16.6	16	13.5	12.7	12.2
10.8	16.3	11.6	10.4	11.9	10.1			6.5	20.2	14.6	11.5	10.2	8.2			9	18	16.1	12.9	12	11.9
8.6	18.1	13.6	11	13.2	10			7	22.5	13.3	10.7	9.5	8			8.8	14.2	16.8	16.8	15.1	13.9
11	18	12.7	10.2	10	11			10.8	21	16.2	13.5	13.4	11.4			8.9	16.8	15.8	13.5	13.8	11.32
7.4	15.7	14.5	11.9	10.7	11.4			6.5	21.5	11.1	10.2	10.5	8.3			10	19.4	19.2	12.9	12.8	12
7.2	15.9	13.5	11.2	12	10.2			8.4	19.9	13	11.4	10.9	9.7			7.9	15.8	18.8	16.4	12.8	10.1
6.7	16.5	11.7	10.7	9.2	8.4			9.7	21.6	14.2	11.8	13.5	10.3			8.9	17.2	16.8	12.4	11.5	10.7
6.7	15.9	13.3	10.3	8.7	9.1			7.1	15.9	13.7	12.4	14.1	10.3			9.8	19.1	17.6	14.3	11.6	12.2
6.9	19.9	12.6	10.3	10.3	10.7			8.7	20.3	13.3	12.2	13.3	11.5			10.4	18.4	20.8	16.4	14.3	13
7.7	16.9	9	8.2	9.6	8.7			6	16.3	9.9	8	8.3	6.7			9.5	16.7	17	11.2	11	9.6
7.3	18.6	16.2	12	10.5	8.7			5.2	16.6	7.3	5	6.8	4.8			9.9	18.1	15.7	11.6	11.6	11.2
8.1	16.8	13	8.7	9.3	8.4			8.5	15.8	8.9	8.8	7.9	6.8			9.4	19.2	16.9	11.4	11.8	9.9
7.9	16.4	13.4	8.9	9.8	8.6			8.6	17.3	11.2	8.8	10.2	7.5			10.4	18.5	15.3	10.3	10.9	10.5
7	15.4	10.9	9	9.2	9.2			8.4	17.9	8.8	9.6	9.8	9.3			9.4	18.1	15.6	12.8	12.1	10.5
6	18.9	13.8	10.9	8.6	7.7			8.7	22.6	11.7	11.9	11	10.1			7.5	22.5	16.4	10.6	10.1	10.3
6.9	17.9	12.2	11.2	10	8.8			7.8	19.4	9.1	10.7	10.5	8			8.3	18.3	14.9	10.4	10.8	11
7.5	20.3	13	10	9	9.8			10.3	18.1	10	12.5	12.5	9.1			8.9	19.1	13.5	9.6	9.3	9.4
6.9	15.9	12.1	10.5	10.3	8.9			8.9	13	8.1	8.3	8	8.7			9	14.8	12.5	12.5	8.9	8.2
7.3	18.8	13	9.7	10.4	9.5			10	16.7	12.1	11.6	10.8	10.2			10.7	19.8	13.8	12.5	11.9	10.3
9.2	16.9	13.9	10.4	9.7	9.4			10.1	23.4	12.3	13.3	8.5	9.4			11.2	18.1	12.4	11.9	12	11.4
8.2	18.4	12.3	8.9	7.7	8.3			8.6	21.3	12.2	11.7	10.2	9.5			10.7	20.9	15.1	10.7	11.9	11.8
7.7	15.8	12.4	12	11.2	10.7			7.2	16.5	11.7	9.9	10.8	7.2			10.4	16.5	12	10.4	11	8.9
8.3	17.3	15.3	10.5	8.8	7.7			5.3	16.6	12.3	9.7	7.4	5.3			11.1	20.2	14.5	11.9	13.3	10.2
6.8	15.7	10	8.3	8.4	6.4			8.7	20.8	11.2	11.1	10.6	10.5			10.2	18.1	11.7	10.5	11.8	11.1
7.5	15.3	11.7	9.7	11.4	10.3			9.1	17.1	9	10.1	10	9			11.2	19.4	14.7	15.1	13.7	13.4
7.7	15.7	12.5	9.4	9.5	8.9			8.6	16.7	12.9	13.3	11	9.3			9.3	14.7	12.5	14.3	11.6	11
7.8	15.6	10.2	10.6	9	9			10.3	17.5	11.4	10.4	10	9.2			9	18.4	15.8	14.6	14.5	12.4
7	16.1	13.9	10.8	10.5	10.5			5.2	14.9	10.6	7.8	6.3	5			9.4	18	15.9	12.3	10.7	11.9
8	16	12.7	11.4	11.6	11			8.1	17.7	9.9	9.8	9	8.6			10.4	16.9	16	13.5	11.7	13.4
6.9	15.2	9.3	9.2	10.6	7.6			4.7	17.7	12.8	9.8	8.1	5.9			12.4	20.8	16.3	14.6	13.5	12.9
8.5	19.8	11.5	10.8	12.5	11.4			9	18.9	13.4	13.9	12	11.3			13.7	18.6	14.5	14.4	14.8	16.3
9	18.4	13.9	13.7	13.1	9.7			10.4	17.3	11.8	12.4	11.7	10.5			11.5	21.9	14.1	12.5	12.3	13.3
8.4	16.5	13.7	10.7	11.8	9.2			8.2	18.3	13.4	10	10.5	10.9			12.2	18	12.8	14.5	14.9	12.9
7.3	15.6	11.3	11.2	12.4	8.8			10.3	23.3	18.6	16.9	14	10.9			13.4	17.6	14.1	13.3	12.2	10.5

## Sheet: Figure 2B
AUC 4 weeks
Chow		High Starch		High fat
1231.5		1132.5		1410.75
1160.25		1155.75		1566.75
1163.25		1142.25		1433.25
894.75		1269.75		1674
1189.5		1318.5		1435.5
1115.25		973.5		1400.25
965.25		1152		1404.75
1082.25		1175.25		1263.75
975.75		1194.75		1077.75
1067.25		1130.25		1254
930		1176.75		1376.25
1131.75		1021.5		1211.25
1074.75		1095.75		1221
1152		1083.75		1331.25
1086		1314		1238.55
1098.75		1051.5		1315.5
1086		1118.25		1263.75
966.75		1245		1182
975		1155		1282.5
1086		1224		1428.75
915.75		845.25		1136.25
1123.5		697.5		1184.25
973.5		846		1197
989.25		966		1142.25
927		967.5		1197.75
1008		1157.25		1180.5
1028.25		1002.75		1124.25
1055.25		1104		1050
994.5		818.25		987.75
1053.75		1077		1194
1046.25		1143		1161
953.25		1114.5		1225.5
1073.25		976.5		1042.5
1022.25		864.75		1234.5
846		1107.75		1113
1017.75		971.25		1331.25
969		1095		1118.25
942		1029.75		1311.75
1058.25		755.25		1182.75
1087.5		953.25		1238.25
909.75		910.5		1365.75
1147.5		1200		1392.75
1197.75		1121.25		1290
1080		1086.75		1299.75
1037.25		1437.75		1207.5

## Sheet: Figure 2C
insulin 4 weeks
Chow					High Starch					High Fat
0	15	30			0	15	30			0	15	30
8.28384	46.8922	17.8935			10.4529	31.7883	18.6519			13.4705	31.0776	17.7291
10.9249	56.5868	18.6943			13.863	26.0129	18.1958			14.1281	46.9188	26.4266
13.4599	33.8672	21.0172			10.5802	22.9635	25.6099			10.8401	26.8137	19.8982
27.5615	59.8324	23.6795			19.3572	20.8952	20.7732			9.68922	23.4461	18.9542
14.5418	31.8201	19.3466			23.5734	32.1913	28.5532			20.2376	56.783	34.8642
10.3643	41.7771	12.9683			5.04226	33.794	7.96597			8.49703	47.5046	21.8878
	29.751	16.9998			6.37277	22.3618	13.8591			9.53632	26.2106	22.5959
14.2931	36.5121	11.7919			7.94884	35.1188	15.595			9.15372	33.2686	19.8264
13.0825	18.0048	10.3815			13.111	28.312	14.196			17.6467	59.9655	46.9598
9.82184	26.2677	15.4237			15.7492	23.2698	13.2481			13.9729	25.717	23.994
9.12421	56.6295	16.747			6.2005	23.6569	10.2			11.5551	35.6047	17.7523
6.66249	27.0954	14.2588			4.70235	52.7818	7.28287			10.538	26.6507	29.9077
9.3024	36.6255	19.7697			4.27336	29.7617	12.8597			13.9173	31.8308	23.0213
5.50092	18.4695	11.8499			4.35916	37.8597	10.8006			12.161	36.1494	42.4689
10.6818	21.2414	27.8808			8.20024	17.0044	11.2031			11.0605	42.052	33.9429
14.0896	39.8566	22.3933			10.0434	28.1014	8.41485			15.179	32.6089	44.7199
11.4106	46.076	24.5442			11.922	33.8484	10.0823			8.7928	17.8024	14.7121
20.6759	37.161	20.5925			11.6663	40.1067	15.8348			9.88217	20.4257	20.0923
9.97666	26.0449	16.7463			12.5445	23.6383	13.317			16.3161	70.9483	65.2069
8.45932	23.3548	9.51534			15.3513	28.974	18.8306			18.8333	55.1207	40.9425
8.03448	66.5402	15.9023			8.09195	41.477	9.32184			14.7759	42.5977	36.8046
10.3621	43.546	20.7471			19.6034	86.2011	12.0747			9.7069	40.6897	25.9483
13.3103	21.9138	17.9828			12.9655	49.1897	16.5862			11.5632	36.5115	27.2184
13.0747	30.3161	20.8793			12.1379	31.0862	12.5517			8.55353	96.1179	18.0894
6.78191	35.4238	18.9259			11.1092	32.2011	11.7529			8.92673	44.2004	15.6958
6.7476	42.2486	13.9327			7.79427	86.7708	17.0942			7.79427	38.4609	8.66507
10.8399	47.808	19.0074			8.72512	86.3933	13.3622			8.72512	18.6728	7.78569
8.55353	32.4854	17.3988			13.122	50.6563	14.795			18.938	126.746	40.8397
8.92673	28.7577	16.1719			6.78191	40.3312	10.9815			22.7158	87.7628	46.9081
10.5064	23.8868	12.6218			6.7476	30.9969	17.5017			9.29274	43.25	15.7286
7.19444	27.7073	15.203			17.2329	83.844	22.9765			11.0833	34.5192	27.4252
8.57051	40.8056	18.1432			13.7671	73.2115	15.7158			12.7543	36.0748	14.9295
5.49359	41.5534	16.6389			28.203	73.8483	26.6731			23.3873	94.5616	46.691
10.9081	30.8825	11.5321			23.156	53.015	26.6047			15.3549	44.0292	41.0699
12.6603	45.1774	18.5235			13.6688	40.6047	20.75			20.2714	55.7411	38.1054
9.05769	28.5962	17.7585			14.7286	53.9466	12.8312			14.5459	56.8841	35.6002
9.13883	31.8319	13.1889			18.6517	25.438	18.6688			14.9687	35.4749	51.3518
8.89353	42.3852	22.3591			17.0662	40.6859	12.7543			18.1942	64.0031	60.2453
10.1409	38.7317	25.1514			3.66453	35.7073	9.47222			18.1263	67.881	28.3559
8.62213	36.9781	7.07203			12.5833	42.4594	29.833			13.5438	57.7714	28.2881
11.7641	56.0073	12.9175			23.5595	72.1816	29.833			12.1608	34.5146	20.6942
10.4802	27.8079	15.0261			28.8152	49.3319	34.3685			11.1639	33.9718	14.5668
9.57203	24.6451	12.6044			29.0814	72.9332	36.1795
8.09499	27.2912	13.2046			20.3079	44.238	21.5397
					14.9113	24.739	16.7589

## Sheet: Figure 2D
Glucose Tolerance test 12 weeks
Chow								High Starch								High Fat
0	15	30	45	60	90			0	15	30	45	60	90			0	15	30	45	60	90
7.9	15.4	12.2	11.4	11.4	10.4			7.9	19.8	13	12.2	11.5	9.9			9.7	18.5	19	16.6	16.4	13.3
8.7	15.8	14	12	12.2	11.8			7.6	14.7	11.8	9.1	9	7.5			9.7	16.9	17.5	12.9	11.3	10.5
9.9	16.8	15.2	9.4	9.2	9.6			8.3	17.8	11	8.5	8.4	8.8			8.8	15.1	14.8	13.7	13	11.5
6.6	18	12.8	9.5	8.7	7.5			7.7	17.4	9.6	9.3	9.3	8.7			8.5	13.3	14.2	11	7.9	6.8
6.3	15.9	13.2	10.5	9.8	9.7			8.9	14.8	9	8.9	8.4	7.9			8.8	14.7	12.2	8.7	8.4	7.7
7.8	15.4	10.3	8.4	8.9	7.8			8.7	16.4	12.1	10.4	11.2	10.5			11.4	14.9	16.9	12.3	10.9	9.5
6.3	12.5	12.4	9.3	9.8	7.8			4.9	14.6	10.2	8.7	7.3	5.7			9.5	14.6	18.1	14.5	11.9	12.2
7	12.9	10.3	8.9	9.2	8.9			10.4	20.5	13.3	11.3	11.5	10.7			11.3	16.8	16.1	13.9	12.9	12.2
6.8	14.7	11.9	9	9.2	7.7			7.2	15	10.8	11	9.7	6.7			8.3	16.7	13.7	11.6	11.4	10.1
9	17.1	12.9	8.8	9.9	9.7			8.2	14.3	9.2	10.2	9.6	9.4			6	17.2	13.9	11.4	9.5	8.3
11.3	17.6	12.7	13	12.3	11.2			11.3	20.4	13.3	11.9	14.2	11.8			12	19	12.3	12	13.3	13.3
11.5	16.5	12.5	12.5	12.8	10.7			10.5	21.4	12.6	12	12	11.3			11.9	21.8	18.3	13.4	13.2	14.2
8.9	15.3	9.9	11.2	11.3	10.6			8.7	16.5	12.8	10.1	11	8.9			12.4	21.4	17.3	15.3	16.1	15.5
9.7	15.1	12.2	10.9	11.7	10			6.9	14.7	9	8.6	7.1	5.7			12.3	18.8	11.7	11.6	12.9	13.9
10.7	15.5	11.7	13.3	11.2	10.7			12.7	20	13	14.9	14.4	11.7			13	20.1	15.1	12.6	12	12.7
6.8	16.8	9.2	8.8	7.7	7.2			8	21	12.5	10.9	10.4	9.3			10.5	21.4	15.6	14.3	16.5	14.4
6.3	14.6	11.4	7.7	7.7	6.7			7.9	20.8	12	10.2	12.3	12.6			9.4	16.3	14.4	13.3	13.9	14.3
5.8	12.5	8.3	6.2	6.4	6			6.9	18.1	12.3	11	11.9	10.7			12.3	21.8	17	15.1	16.5	16.5
7.4	16.3	12.2	10	10.2	10.7			5	15.6	10.1	8.9	7.6	5.8			9.4	17.7	16	15.4	16.1	14
7.4	13.9	12.2	10.2	9.8	8.8			8.9	17.9	14.1	13.2	13.1	10.4			8.7	16.2	16.5	15.9	15.2	15.4

## Sheet: Figure 2E
Area Under the Curve 12 weeks
Chow		High Starch		High Fat
1056.75		1141.5		1452.75
1143.75		906		1194
1046.25		942.75		1185
962.25		942		921
1007.25		864.75		904.5
887.25		1058.25		1134.75
897.75		789		1230
874.5		1173.75		1260
907.5		924.75		1100.25
1017.75		924		1020.75
1179		1265.25		1238.25
1157.25		1208.25		1401.75
1026		1037.25		1497.75
1059		781.5		1222.5
1100.25		1313.25		1275
854.25		1099.5		1435.5
826.5		1170		1257.75
682.5		1101		1519.5
1023		814.5		1379.25
952.5		1195.5		1367.25

## Sheet: Figure 2F
Insulin 12 weeks
Chow					High Starch					High Fat
0	15	30			0	15	30			0	15	30
11.0887	33.26	11.7669			16.3551	56.6227	16.7583			13.392	30.6452	17.412
12.7444	30.4863	21.1327			10.6549	42.0332	17.6931			9.67742	28.9345	17.9924
13.1598	19.5992	11.5347			17.3631	70.589	21.4565			8.99927	29.9304	16.1351
11.5103	38.2087	21.4565			11.1009	55.9445	11.2292			5.56574	26.3319	10.3922
13.3614	20.4668	14.4489			8.6327	67.9191	11.0398			7.80181	32.8018	12.1457
8.71576	42.858	17.7619			12.6201	59.2504	26.9101			10.752	61.7672	51.4536
5.4481	22.9457	12.9986			3.88035	26.4777	10.4877			9.89308	37.3558	30.4901
7.81475	27.0723	12.3138			10.6379	55.6403	19.8342			10.758	20.2186	11.605
9.14224	27.2285	14.4462			13.7013	35.1634	14.2059			8.91984	29.7593	15.6953
10.5178	25.7689	12.482			19.1194	58.92	26.1533				76.8878	30.7368
11.8986	80.1055	18.5751			27.2705	127.455	47.5454			25.8407	151.927	40.5314
17.5871	56.8176	19.4833			20.7167	83.0388	26.5157			69.0169	185.665	155.627
13.5002	66.188	24.3311			66.998	142.041	83.4499			19.7717	115.765	40.2921
9.89813	63.1382	27.0741			48.2941	106.977	45.5265			20.5081	153.418	59.0636
19.2931	56.5783	17.9799			25.3068	108.616	34.1986			15.556	58.4008	45.3424
11.6905	57.3419	13.6295			24.6988	75.0126	17.1624			27.4661	139.746	49.2219
3.93449	25.2196	6.21862			21.0467	103.52	36.3768			13.4162	117.282	67.4322
2.56652	31.2374	6.05547			27.943	97.2829	33.804			50.7718	162.889	113.912
6.46335	61.6215	25.8158			29.3737	56.5575	15.7631			16.993	84.4629	43.0095
6.35668	34.4064	21.3353			8.49649	40.6376	14.2319			17.8778	77.8175	48.8015

## Sheet: Figure 2G
Glucose tolerance test 14 weeks
Chow
0	15	30	45	60	90
7.85	14.7	13.5	12.5	11.8	10.7
7.45	16.6	13	12	12.7	10.6
7.55	14.7	12.4	9.6	10.1	9.4
6.5	13.3	12.3	10.1	8.4	8
11.3	23.8	20.6	17	15.3	14.3
7.7	16	13.9	11.6	11.6	10.9
7.4	15.7	10.4	9.8	10	9.4
6.6	13.8	10.8	10.5	9.2	7.5
6.95	13.8	13.9	11.8	9.5	8.7
7.95	19.6	14.7	11.8	10.7	8.9
High Starch
0	15	30	45	60	90
8.3	18.6	11	13.6	12.1	10.9
8.05	17.5	15	13.6	11.4	10.9
7.9	14.6	15.9	15.1	13.3	10.7
11	25.5	21.9	19.1	17.6	15.3
13.35	26.5	26.2	22.6	24.1	20.3
12.35	21.9	15.3	15	12.4	10.1
11.95	19.1	15.6	13.9	11.7	10.7
11.2	18	15.7	17.3	14.2	13.8
10.95	18.9	13.9	12.4	11.4	8.7
12.15	16.1	13.8	13.7	13.8	13.5
High Fat
0	15	30	45	60	90
11.75	21.9	22	21.6	18.9	18.4
8.2	17.5	15.6	17.1	17.5	12.9
9.9	16.9	16.6	13.5	12.4	12.8
9.75	18.2	17.9	16.7	14.5	13
11.15	16.2	18.9	17.3	15.4	13.9
11.55	19.6	21.3	20.8	18.2	17.9
11.15	21.5	25.7	20	17.4	15.9
11.15	21.6	21.5	20.9	18.1	16.8
13	20.5	21.7	22.1	21.5	20.3
13.3	25	28	27.7	28.2	27.3

## Sheet: Figure 2H
Tracer enrichment
Chow							High Starch							High Fat
0	15	30	60	90			0	15	30	60	90			0	15	30	60	90
0	0.351692	0.459413	0.501666	0.339693			0	0.639214	0.560544	0.282712	0.160891			0	0.433308	0.564644	0.474401	0.331759
0	0.466843	0.625436	0.48123	0.265614			0	0.479728	0.613767	0.487571	0.277851			0	0.413187	0.579705	0.559157	0.254129
0	0.503592	0.65955	0.253513	0.121324			0	0.470935	0.624949	0.549613	0.337262			0	0.47531	0.627774	0.425546	0.224034
0	0.498043	0.692762	0.458741	0.22206			0	0.434458	0.485476	0.368497	0.214837			0	0.374698	0.481567	0.427471	0.370549
0	0.543456	0.610616	0.279283	0.125939			0	0.454358	0.497592	0.310997	0.201958			0	0.412223	0.573274	0.532342	0.348096
0	0.550925	0.699883	0.385027	0.195461			0	0.568718	0.520643	0.253057	0.130775			0	0.408534	0.552829	0.418598	0.277148
0	0.591505	0.705343	0.434936	0.240936			0	0.535188	0.560292	0.281676	0.139373			0	0.420907	0.539343	0.501574	0.353234
0	0.564003	0.728881	0.61524	0.329308			0	0.520813	0.606218	0.418928	0.257662			0	0.455193	0.564828	0.411883	0.261727
0	0.435883	0.646448	0.543403	0.338517			0	0.551485	0.540067	0.300138	0.155739			0	0.423065	0.476836	0.377293	0.25521
0	0.554033	0.652016	0.354995	0.164417			0	0.534741	0.569377	0.33348	0.222483			0	0.387404	0.486414	0.495219	0.406595

## Sheet: Figure 2I
Exogenous glucose
Chow							High Starch							High Fat
0	15	30	60	90			0	15	30	60	90			0	15	30	60	90
0	5.16987	6.20207	5.91966	3.63471			0	11.8894	6.16598	3.42081	1.75371			0	9.48946	12.4222	8.96618	6.10437
0	7.74959	8.13067	6.11162	2.8155			0	8.39524	9.20651	5.55831	3.02858			0	7.23077	9.0434	9.78525	3.27826
0	7.40281	8.17842	2.56048	1.14044			0	6.87566	9.93669	7.30985	3.60871			0	8.03273	10.421	5.27677	2.86763
0	6.62397	8.52097	3.85343	1.77648			0	11.0787	10.6319	6.48555	3.28701			0	6.81951	8.62004	6.19833	4.81714
0	12.9343	12.5787	4.27304	1.80092			0	12.0405	13.0369	7.49503	4.09975			0	6.67801	10.8349	8.19807	4.83853
0	8.8148	9.72837	4.46631	2.13053			0	12.4549	7.96583	3.13791	1.32083			0	8.00727	11.7753	7.61848	4.96096
0	9.28663	7.33557	4.34936	2.2648			0	10.2221	8.74056	3.29561	1.49129			0	9.04951	13.8611	8.72739	5.61643
0	7.78324	7.87191	5.6602	2.46981			0	9.37464	9.51762	5.94878	3.55574			0	9.83217	12.1438	7.45509	4.39701
0	6.01518	8.98563	5.16233	2.9451			0	10.4231	7.50693	3.42157	1.35493			0	8.67283	10.3473	8.1118	5.18077
0	10.859	9.58463	3.79845	1.46331			0	8.60933	7.8574	4.60203	3.00351			0	9.68511	13.6196	13.9652	11.1001

## Sheet: Figure 2J
Endogenous Glucose production expressed as a change from baseline
Chow							High Starch							High Fat
0	15	30	60	90			0	15	30	60	90			0	15	30	60	90
0	1.68013	-0.552071	-1.96966	-0.784712			0	-1.58937	-3.46598	0.37919	0.846292			0	0.660545	-2.17217	-1.81618	0.545631
0	1.40041	-2.58067	-0.861622	0.334496			0	1.05476	-2.25651	-2.20831	-0.178575			0	2.06923	-1.6434	-0.485246	1.42174
0	-0.252808	-3.32842	-0.0104809	0.709556			0	-0.175657	-1.93669	-1.90985	-0.808708			0	-1.03273	-3.72104	-2.77677	0.032366
0	0.176028	-2.72097	-1.95343	-0.276477			0	3.42132	0.268068	0.114445	1.01299			0	1.63049	-0.470041	-1.44833	-1.56714
0	-0.43425	-3.27868	-0.273037	1.19908			0	1.10951	-0.186898	3.25497	2.85025			0	-1.62801	-3.08488	-3.94807	-2.08853
0	-0.514799	-3.52837	-0.566312	1.06947			0	-2.90493	-5.01583	-3.08791	-3.57083			0	0.0427302	-2.02526	-0.968476	1.38904
0	-0.986628	-4.33557	-1.74936	-0.264798			0	-3.07209	-5.09056	-3.54561	-2.74129			0	1.30049	0.688892	-2.47739	-0.866425
0	-0.583238	-3.67191	-3.0602	-1.56981			0	-2.57464	-5.01762	-2.94878	-0.955742			0	0.617826	-1.79381	-0.505088	1.25299
0	0.834817	-2.03563	-2.61233	-1.1951			0	-2.47307	-4.55693	-2.97157	-3.60493			0	-1.17283	-1.64735	0.388198	2.11923
0	0.790951	-2.83463	-1.04845	-0.513314			0	-4.65933	-6.2074	-2.95203	-1.65351			0	2.01489	1.0804	0.93482	2.89995

[truncated: 2 more sheets: Figure 2K, Figure 2L]
