# Supplementary material for: Insulin sensitivity is preserved in mice made obese by feeding a high starch diet
Source: eLife. 2022 Nov 17;11:e79250. doi: 10.7554/eLife.79250 (PMC9711519; doi:10.7554/eLife.79250)
Supplement: Figure 3—source data 1. [file elife-79250-fig3-data1.xlsx]

## Sheet: Figure 3A
Blood glucose levels during clamp
Chow
time
0	8.6	9.4	7.9	10.6	6.2	8	6.4	4.9	3.6	7.8	10
	4.5	5.2	6.5	7	6.8	7.3	4.8	5.2	7.9	5.4	7.7
20	6.2	5	6.3	5.9	4.9	6	6.2	6.9	8.8	7	5.7
	6.2	7.3	6.9	6.8	6.3	6.9	5.8	7.8	8.3	7.8	5.9
40	8	8.1	8.9	6.2	7.8	9	7.4	7.2	8.8	7.7	6.8
	6.2	8.4	8.7	9.1	9.2	7.3	6.8	8.2	8.2	7.3	7.9
60	8	6.4	9.6	9.3	9.5	8	7.7	11.4	8	7.9	7.4
	9.3	6.8	9.3	9.1	9.8	8	7.4	10.3	8	9	5.9
80	9.2	8.7	9.6	8.7	8.3	7.9	7.3	9.6	8.6	8.6	12
	8.5	9.5	9.5	7.9	7.9	9.2	7.7	6.7	8.9	8.4	12
100	8.8	9.6	8.8	8	8.2	7.9	7.4	6.9	8.7	8.2	9.9
	8.5	7.4	7.3	8.6	7.8	8.3	7.9	6.8	8.7	8	9.8
120	7.3	6.4	7.4	8.8	6.3	8.3	8.1	7.5	9	8.3	9.5
High Starch
time
0	9.4	8.9	9.4	8.3	9.4	9.2	7.9	4.5	8.6	8.6	7.5
	5.9	9.4	8	7.2	7.4	9.1	6.1	11.3	7.5	8.6	4.8
20	6.1	6.5	7.3	6	5.4	7.4	6.6	10.2	6.7	5.7	6.2
	7.8	7.4	6.5	7	6.3	7.7	7.6	10	7.2	8.2	6.4
40	8.5	7.4	8	7.8	7.5	7.8	7.6	8.3	7.6	8.6	7.9
	7.9	8.1	7.7	6.9	8.4	7.9	7.4	7.7	7.7	9.2	8.6
60	6.2	8.7	8.5	9.8	7.8	8.2	8.2	7.7	6.9	8.8	8.7
	6.4	6	8.3	8.2	7	8.2	8.8	8.1	7.7	9.4	7.2
80	7.7	6.3	8.6	8	7.5	8.4	9	8.3	7.8	9	7.8
	9.3	7	9.2	9.2	8.5	8	6.7	8.3	8.4	8.8	7
100	9.7	6.7	9.3	8.5	9	8.2	5.8	8.1	8.3	7.6	8.3
	9.4	8.9	8.3	9.8	9	7.7	8.2	7.8	8.3	7.1	9
120	7.2	6.4	8.6	8.9	8.3	6.6	8.9	7.5	7.9	7.3	9.4
High Fat
time
0	10	9.3	9.8	10.2	6.8	6.2	7.6	6.5	7.5	8.7
	6.1	10.7	10.1	6.4	8.1	6.4	8.3	5.3	6.8	7.9
20	6.8	8.8	8.9	7.7	8.5	6.5	7.4	5.4	6.8	7.5
	8.7	7.3	9.4	9	7.9	6.2	7.1	7.7	6.7	6.6
40	9.2	7.7	7.9	9.3	7.7	7.3	7	8.9	6.9	6.5
	10	7.5	7.9	9.2	8.3	7.4	8.4	7.9	7.5	6.9
60	9.2	7.9	7.8	6.5	8.7	7.4	8	8.5	7.7	9.3
	8.3	7.7	8.2	7	8.7	8	7.5	8.8	7.4	10.2
80	8.2	8	8.2	7.5	8	8	7.5	8.5	8.5	9.9
	8	7.6	8.3	6.9	8.5	7.9	7.5	8	8.4	8.8
100	8.5	7.4	8.7	8	8.5	8.2	8	8	8.9	8.6
	8.4	7.8	8.8	8.9	8.2	8.3	8.4	7.5	8.7	8.4
120	8.1	7.9	8.3	8.4	7.9	8.9	8.9	7.9	9.1	8

## Sheet: Figure 3B
Chow
Basal	20.07	14.64	6.19	11.45	15.04	16.58	36.98	14.64	25.14	25.2	11.11
Clamp	106.72	117.4	147.12	130.19	118.44	133.51	244.78	189.46	197.68	163.6	150.59
High Starch
Basal	21.8	19.25	18.84	18.99	8.97	22.43	12.51	134.07	55.7	46.39	36.89
Clamp	135.3	162.17	131.11	130.65	125.4	133.96	118.21	359.04	201.78	113.11	183.21
High Fat
Basal	17.36	21.49	46.83	39.36	30.14	58.75	30.34	17.37	31.56
Clamp	133.69	119.17	110.61	96.98	95.13	205.18	162.7	147.41	167.41

## Sheet: Figure 3C
Glocose infusion rate
chow
time
0	0	0	0	0	0	0	0	0	0	0	0
	29.34	29.76	25.61	19.65	9.26	9.69	31.41	30.19	31.09	23.45	17.54
20	39.12	49.6	42.69	39.31	27.78	29.07	41.88	30.19	26.95	23.45	35.07
	58.69	49.6	47.81	47.17	37.04	38.76	50.25	30.19	26.95	23.45	43.84
40	54.77	47.62	42.69	55.03	37.04	32.95	46.06	34.22	26.95	25.02	43.84
	58.69	45.63	40.98	49.14	33.33	34.88	50.25	34.22	29.02	28.14	43.84
60	58.69	49.6	35.86	43.24	27.78	34.88	50.25	28.18	31.09	28.14	45.59
	50.86	51.59	32.45	37.34	18.52	34.88	52.35	28.18	31.09	26.58	45.59
80	46.95	49.6	29.03	37.34	22.22	34.88	56.53	28.18	31.09	26.58	40.33
	46.95	45.63	25.61	41.27	25.93	31.01	56.53	32.21	31.09	26.58	29.81
100	44.99	41.67	27.32	41.27	25.93	32.95	56.53	32.21	31.09	26.58	29.81
	44.99	43.65	30.74	39.31	29.63	32.95	56.53	34.22	31.09	27.36	26.3
120	46.95	47.62	32.45	39.31	35.19	32.95	56.53	34.22	29.02	27.36	26.3
High Starch
time
0	0	0	0	0	0	0	0	0	0	0	0
	31.73	10.36	9.02	18.77	21.37	10.47	31.09	28.41	8.06	7.8	23.63
20	42.3	31.09	18.04	37.54	42.74	20.94	41.46	28.41	16.12	23.39	31.51
	42.3	31.09	27.06	37.54	47.01	20.94	41.46	22.73	16.12	23.39	39.38
40	40.19	33.17	27.06	39.41	47.01	23.03	41.46	24.62	16.12	21.83	39.38
	40.19	33.17	30.66	43.17	44.87	25.13	43.53	28.41	17.74	18.71	34.66
60	48.65	31.72	28.86	33.78	47.01	25.13	43.53	30.3	20.96	18.71	31.51
	54.99	33.17	28.86	35.66	51.28	25.13	41.46	30.3	20.96	15.59	29.93
80	52.88	35.24	27.96	35.66	51.28	25.13	37.31	30.3	20.96	12.48	33.08
	46.53	35.24	25.25	28.15	47.01	26.17	39.39	30.3	19.35	12.48	34.66
100	40.19	37.31	19.84	30.03	42.74	26.17	47.68	30.3	19.35	14.03	33.08
	38.07	35.24	21.65	22.52	38.46	28.27	47.68	30.3	19.35	18.71	29.93
120	42.3	35.24	21.65	22.52	38.46	32.45	43.53	32.2	19.35	18.71	26.78
High Fat
time
0	0	0	0	0	0	0	0	0	0	0
	32.89	11.02	11.9	28.41	9.92	10.26	7.44	25.51	14.91	7.64
20	43.86	11.02	11.9	24.62	9.92	16.42	11.9	34.01	19.39	15.28
	39.47	17.64	11.9	20.83	9.92	24.63	17.86	34.01	26.84	21.4
40	32.89	22.05	19.05	15.15	11.9	24.63	22.32	28.91	26.84	27.51
	21.93	24.25	19.05	11.36	11.9	26.68	19.35	30.61	26.84	30.57
60	21.93	24.25	21.43	15.15	9.92	26.68	19.35	29.76	28.33	24.46
	26.32	26.46	21.43	15.15	9.92	26.68	20.83	28.06	29.83	18.34
80	26.32	26.46	21.43	15.15	9.92	26.68	20.83	26.36	28.33	15.28
	26.32	26.46	21.43	18.94	9.92	26.68	20.83	26.36	28.33	15.28
100	24.12	26.46	19.05	18.94	9.92	26.68	20.83	26.36	25.35	15.28
	24.12	26.46	19.05	17.05	9.92	26.68	19.35	27.21	25.35	15.28
120	24.12	26.46	19.05	17.05	9.92	22.58	17.86	27.21	22.37	16.81

## Sheet: Figure 3D
average Glucose infusion rate
Chow
45.65	44.38	29.91	39.96	32.62	32.95	56.53	33.55	30.39	27.1	27.48
High Starch
40.18	35.97	21.03	25	40.12	30.15	46.3	30.93	19.35	18.71	29.84
High Fat
24.12	26.46	19.05	17.63	9.92	25.31	19.35	26.93	24.25	15.8

## Sheet: Figure 2E
Whole Body Glucose Dissapearance
Chow
Basal	25.66	30.92	20.28	37.66	17.5	14.82	20.48	13.77	15.72	12.25	29.54
Clamp	50.27	51.64	23.66	50.99	32.63	37.38	52.23	37.82	36.44	29.16	43.73
High Starch
Basal	23.19	18.49	18.48	17.24	18.67	28.14	20.25	13.97	15.3	25.04	16.03
Clamp	44.86	46.6	28.31	33.39	50.34	38.91	41.07	29.25	31.71	37.51	42.39
High Fat
Basal	22.62	33.23	29.48	28.55	16.26	34.99	21.67	17.42	20.21	17.34
Clamp	36.7	38.88	40.35	32.87	30.78	41.3	40.03	38.36	40.93	30.4

## Sheet: Figure 3F
Hepatic glucose output
Chow
Basal	25.66	30.92	20.28	37.66	17.5	14.82	20.48	13.77	15.72	12.25	29.54
Clamp	4.62	7.26	-6.25	11.02	0.01	4.43	-4.3	4.27	6.05	2.06	16.24
High Starch
Basal	23.19	18.49	18.48	17.24	18.67	28.14	20.25	13.97	15.3	25.04	16.03
Clamp	4.67	10.64	7.28	8.39	10.22	8.76	-5.22	-1.68	12.36	18.79	12.55
High Fat
Basal	22.62	33.23	29.48	28.55	16.26	34.99	21.67	17.42	20.21	17.34
Clamp	12.58	12.42	21.3	15.24	20.86	15.99	20.69	11.44	16.68	14.61

## Sheet: Figure 3G
% suppression of Hepatic glucose output
Chow
81.99	76.52	130.8	70.73	99.96	70.09	121.01	69	61.53	83.19	45
High Starch
79.86	42.49	60.59	51.33	45.27	68.87	125.79	112.05	19.16	24.94	21.68
High fat
44.38	62.61	27.74	46.63	-28.26	54.3	4.54	34.36	17.47	15.75

## Sheet: Figure 3H
Muscle glucose uptake
Chow
Quad	17.19	26.28	17.17	25.81	24.02	17.84	26.59	20.95	16.71	12.46	20.54
Gastroc	14.39	22.35	19.62	26.59	35.76	15.19	29.36	18.09	15.55	13.96	14.6
Heart	340.41	295.45	295.54	218.37	516.93	283.78	107.91	190.11	260.17	266.83	197.56
High Starch
Quad	15.48	16.92	22.75	28.3	25.49	16.84	20.87	10.29	17.06	15.02	15.24
Gastroc	18.03	18.76	20.79	32.96	27.35	25.18	19.57	12.81	14.06	12.58	20.8
Heart	268.1	331.02	490.7	344.83	208.75	335.61	338.33	123.75	351.63	297.61	306.9
High fat
Quad		13.05	15.12	14.52	11.53	8.13	11.15	17.74	12.76
Gastroc	17.84	18.76	13.63	17.28	9.43	7.64	14.33	17.13	14.84
Heart	189.18	156.45	120.2	247.31	122.03	84.06	192.92	250.11	286.02

## Sheet: Figure 3I
Adipose Tissue glucose uptake
Chow
iWAT	21.67	27.66	17.77	15.36	9.97	14.62	13.69	8.21	6.07	9.59	3.82
eWAT	8.96	7.63	9.3	3.95	8.18	6.18	5.84	5.59	4.03	5.57	5.23
BAT		61.06	14.76	18.58	17.11	40.16	36.68	25.8	38.39	64.15	25.27
High Starch
iWAT	6.06	5.43	2.99	5.78	7.97	5.93	2.84	3.11	4.97	1.71	4.42
eWAT	3.49	5.88	3.15	4.72	6.1	4.01	3.52	4.72	2.08	2.84	2.44
BAT		103.59	10.93	34.43	47.13	87.78	59.91	35.69	22.66	24.15	58.96
High Fat
iWAT	5.89	2.94	3.21	1.33	2.91	2.78	1.15	5.81	3.14
eWAT	4.23	2.76	3.05	2.41	2.75	2.47	6.53	4.69	1.05
BAT		15.09	11.76	13.63	6.06	17.13	32.07	28.18	28.9

## Sheet: Figure 3J
p/t Akt
Chow
2.1125	1.66882	2.54839	1.85739	1.80128	3.59906	1.28514	1.37735	1.69328	0.840262	1.08983
High Starch
1.0635	2.67349	1.88522	1.52212	2.5204	1.2152	2.01011	1.82732	0.822858	0.709701	0.777214
High fat
1.14769	0.295448	0.812824	1.21935	3.02005	1.26224	0.802414	1.16118	1.20441

[truncated: 3 more sheets: Figure 3K, Figure 3L, Figure 3M]
