# Supplementary material for: Insulin sensitivity is preserved in mice made obese by feeding a high starch diet
Source: eLife. 2022 Nov 17;11:e79250. doi: 10.7554/eLife.79250 (PMC9711519; doi:10.7554/eLife.79250)
Supplement: Figure 4—source data 1. [file elife-79250-fig4-data1.xlsx]

## Sheet: Figure 4A
Tissue weights
Chow						High Starch						High Fat
Liver	Epi	SubQ	RP	BAT		Liver	Epi	SubQ	RP	BAT		Liver	Epi	SubQ	RP	BAT
0.9667	0.216	0.128	0.058	0.096		1.033	1.15	0.62	0.379	0.132		1.01	1.6406	0.64	0.66	0.088
1.1	0.4	0.22	0.106	0.13		0.965	1.475	0.9006	0.46	0.083		0.723	1.47	0.574	0.485	0.1
1.085	0.268	0.195	0.0814	0.152		1.21	1.604	0.923	0.576	0.191		0.974	1.74	0.862	0.474	0.133
1.198	0.509	0.262	0.175	0.154		0.978	1.562	0.856	0.55	0.12		1.3	2.692	1.609		0.213
0.968	0.546	0.4	0.176	0.164		0.886	0.935	0.514	0.276	0.17		1.43	1.4	0.55	0.382	0.136
0.951	0.312	0.189		0.095		0.978	1.6	0.982	0.698			1.55	2.0991	1.18	0.69	0.14
1.12	0.4	0.275	0.125	0.115		0.965	1.319	0.8368		0.087		1.2691	1.39	2.05	0.46	0.13
1.21	0.276	0.192	0.099	0.076		1.54	2.3	1.58	0.58	0.132		1.03	2.37	1.36	0.569	0.085
1.01	0.44	0.32	0.093	0.072		1.34	1.76	1.845	0.34	0.118		1.3942	1.7082	1.8813	0.418	0.133
1.046	0.53	0.273	0.124	0.086		1.61	1.466	1.76	0.427	0.16		1.2719	2.5609	1.8601	0.601	0.108
1.01	1.023	0.45	0.313	0.078		1.2999	1.2374	1.1611	0.3048	0.1001

## Sheet: Figure 4B
average adipocyte size - epididymal
Chow
1160	759.8	870.4	932
High Starch
1699	1885	2111	2782
High fat
2782	2323	2492	2783	2436

## Sheet: Figure 4C
average adipocyte size - subcutaneous
Chow
616.5	418.6	587	391.8
High Starch
1034	1873	1103	1675
High Fat
1183	1083	1721

## Sheet: Figure 4D
Plasma Leptin
Chow		High Starch		High Fat
3.52354		13.758		34.9821
9.59134		10.4369		31.3908
3.69397		10.7015		26.3597
3.02166		23.8729		6.97269
12.645		21.6347		23.8616
9.21469		27.7712		28.032
6.21657		17.8493		33.9529
8.0339		23.338		21.3955
7.08569		17.7608		30.4256
18.468		36.3296		34.6186
		36.3644

## Sheet: Figure 4E
Plasma Adiponectin
Chow		High Starch		High Fat
4.1081		5.41374		6.58117
4.91777		16.6694		5.82142
4.15571		8.5505		5.11756
5.11798		8.1173		3.38733
3.17877		5.11713		4.48343
4.46123		6.73562		7.3471
8.13692		4.34657		3.62343
4.32169		5.9848		4.04574
3.87581		6.85544		4.57912
2.27971		3.54731
3.92045		2.96023

## Sheet: Figure 4F
Liver Triglycerides
Chow
5.45	10.71	7.03	18.7	19.83
High Starch
28.52	37.37	36.09	48.36	19.64	38.21
High Fat
31.48	32.58	29.05	32.63	39.33	30.89	47.01	46.41

## Sheet: Figure 4G
Muscle Triglycerides
Chow
9	7.69	8.35	10.09	6.96	9.38	11.36	7.4	14.75	11.32	13.16	5.1
High Starch
15.61	14.39	20.04	16.1	11.89	16.68	39.91	23.19	23.97	15.98	15.16	20.98
High Fat
19.2	23.79	23.81	22.65	21.72	16.49	25.94	25.5	18.19
