# Supplementary material for: Insulin sensitivity is preserved in mice made obese by feeding a high starch diet
Source: eLife. 2022 Nov 17;11:e79250. doi: 10.7554/eLife.79250 (PMC9711519; doi:10.7554/eLife.79250)
Supplement: Figure 5—source data 1. [file elife-79250-fig5-data1.xlsx]

## Sheet: Figure 5A
Liver Triglycerides
Chow
7.13	10.19	20.05	10.9	12.37	10.072	4.663	7.455	8.043	6.663	5.38	6.758	7.079	8.056	9.149
High Starch
19.77	15.05	18.52	11.69	11.64	11.4	37.1	11.94	11.67	16.73	18.08	10.36	25.63	20.35	37.25
High Fat
10.47	17.81	11.49	23.04	13.09	28.99	36.7	26.66	21.07	31.76	15.08	25.94	13.4	17.1	34.59

## Sheet: Figure 5B
Liver Lipogenesis
Chow
12.564	19.4331	18.0738	46.8927	29.5117	32.787	23.6832	33.6288	16.1811	17.6483	18.0667	13.0936	15.8301
High Starch
26.1844	26.5523	29.8302	24.0229	51.6252	41.0933	28.9196	30.917	40.1993	33.1181	16.1491	16.2102	34.5975	14.0347	32.4502
High fat
19.2347	13.1844	11.1069	13.6894	17.3277	10.5135	11.506	6.83446	14.952	9.40714	10.6209	8.42528	9.18461	15.5785	12.2026

## Sheet: Figure 5C
BAT lipogenesis
Chow
17.3206	18.2762	18.3881	37.1773	22.6046	26.1848	24.4396	34.345	38.5105	29.7375	37.2305	31.7047	37.7656
High Starch
27.4191	15.5311	32.0025	29.2216	26.1289	41.6109	36.9555	29.5646	39.0583	32.3772	14.334	30.8828	48.7989	29.2576	29.1834
High Fat
18.4113	21.489	18.8575	19.9264	30.9103	20.9102	24.4624	26.5453	30.5599	25.2474	28.955	31.1617	31.1772	27.8345	36.1201

## Sheet: Figure 5D
WAT lipogenesis
Chow
eWAT	2.45191	4.60772	1.42226	7.30408	2.06171	6.07249	4.46758	6.77671	2.8092	2.78607	2.96073	2.28156
scWAT	2.56047	3.70225	1.53583	8.45042	2.58483	6.08224	3.10192	6.52853	3.63459	2.30258	3.79997	3.03307	4.37063
rpWAT	2.04432	4.5606	1.15863	9.62888	2.1271	10.8938	4.92983	10.8105	3.55628	2.54397	3.78728	3.14312	4.95475
High Starch
eWAT	4.61876	3.51874	4.62115	4.28165	5.77467	5.56866	4.27878	4.28083	4.50091	4.01429	5.02255	3.36213	5.53022	3.49827	3.21016
scWAT	4.29856	3.97816	4.48095	4.37168	5.8541	5.20294	4.48438	3.96377	5.11904	4.67237	5.4108	4.17334	6.94116	4.1517	6.50608
rpWAT	3.45924	3.31945	4.20464	3.02764	4.79723	6.22268	2.70797	5.05131	4.79581	4.44665	4.06423	3.71021	5.89824	3.4074	3.33774
High Fat
eWAT	3.1045	4.84732	3.8587	3.76738	4.50641	6.81843	4.6994	6.18859	6.60336	5.26113	3.49887	3.20173	3.80008	3.52926	5.07708
scWAT	2.74373	4.08038	4.04959	3.7278	3.66504	5.23678	4.51407	6.40042	6.32636	5.68266	3.55232	3.44869	4.39428	3.74098	4.90491
rpWAT	3.19422	4.2856	3.54232	3.46931	3.86367	6.29536	4.85803	6.7548	9.36647	5.99099	3.45491	3.29853	3.91008	3.24694	6.1319

## Sheet: Figure 5F
Densitometry
Chow
ACC	0.964	0.78	0.815	0.975	1.694	1.194	1.665	2.95	2.72	2.561
FAS	0.802	0.823	0.907	0.867	1.064	0.803	1.12	1.044	1.164	1.334
SCD1	1.121	2.162	0.642	0.851	0.859	2.849	3.022	2.118	1.075	2.766
High Starch
ACC	2.086	1.538	2.202	2.304	3.019	3.977	3.482	2.79	3.745	4.85
FAS	1.546	0.918	1.344	1.344	1.59	1.449	1.593	1.199	1.42	1.61
SCD1	2.118	2.983	1.663	2.137	3.728	3.637	1.545	1.617	2.959
High Fat
ACC	1.447	0.923	0.425	0.635	0.617	0.77	0.993	0.456	0.54	0.386
FAS	1.194	0.937	0.736	0.894	0.962	0.127	0.524	0.685	0.626	0.518
SCD1	0.898	0.579	0.443	0.41	0.776	0.463	0.304	0.197	0.259	0.246

## Sheet: Figure 5G
Liver ACL activity
Chow		Hi-ST		Hi-F
4.35382		12.0801		7.87866
9.64611		12.4834		6.809
9.55289		9.63466		5.58406
5.9258		15.9469		6.59397
7.83864		12.25		5.03992
8.81569		18.1429		1.18446
12.1979		18.9826		4.42193
10.6077		14.2867		5.20883
10.3719		13.8725		3.95707
9.55693		16.1198		12.6219

## Sheet: Figure 5H
GAPDH activity
Chow
4.76747	3.40574	3.12954	3.44302	4.00799	4.36807	4.2423	4.07379	4.50448	5.08644
High Starrch
4.42448	3.70791	5.905	4.26637	7.61555	6.12816	5.04927	4.95839	5.65926	7.75578
High Fat
2.48769	2.62623	2.4535	2.50937	2.40707	2.77064	2.03723	2.55916	2.23657	2.37524
