# Supplementary material for: Insulin sensitivity is preserved in mice made obese by feeding a high starch diet
Source: eLife. 2022 Nov 17;11:e79250. doi: 10.7554/eLife.79250 (PMC9711519; doi:10.7554/eLife.79250)
Supplement: Figure 6—figure supplement 1—source data 1. [file elife-79250-fig6-figsupp1-data1.xlsx]

## Sheet: Supp Figure 1A
Liver sphingomyelin content
Chow
SM (d18:1/16:0)	0.0033	0.0041	0.0037	0.0025	0.0046	0.0035	0.0028	0.0033	0.0047	0.003	0.0042
SM (d18:1/16:1)	0.0552	0.0617	0.0642	0.0536	0.0862	0.0635	0.08	0.0871	0.0856	0.0633	0.0646
SM (d18:1/16:2)	0.0014	0.0028	0.0024	0.0018	0.0032	0.0023	0.0023	0.0032	0.0037	0.0022	0.0025
SM (d18:1/17:0)	0.009	0.0083	0.0089	0.0072	0.0098	0.0096	0.0097	0.0115	0.0103	0.0082	0.0096
SM (d18:1/18:0)	0.2624	0.2552	0.2931	0.2407	0.2832	0.296	0.2572	0.2834	0.2705	0.2523	0.2621
SM (d18:1/18:1)	0.0089	0.0092	0.0104	0.0088	0.0101	0.0094	0.0081	0.0128	0.0099	0.0078	0.0101
SM (d18:1/19:0)	0.0171	0.014	0.0168	0.0157	0.0177	0.0184	0.0139	0.0162	0.0184	0.0182	0.0203
SM (d18:1/20:0)	0.0147	0.014	0.0159	0.0135	0.0194	0.0201	0.0146	0.0143	0.0142	0.0166	0.018
SM (d18:1/21:0)	0.0032	0.0022	0.0026	0.003	0.0041	0.0038	0.0033	0.0036	0.0036	0.0036	0.0037
SM (d18:1/22:0)	0.024	0.0259	0.0373	0.0281	0.0398	0.0341	0.0326	0.0287	0.0296	0.0323	0.0308
SM (d18:1/22:1)	0.0047	0.005	0.0058	0.0048	0.0062	0.0068	0.0056	0.0062	0.0045	0.0055	0.0068
SM (d18:1/23:0)	0.0144	0.0145	0.0159	0.014	0.0207	0.0197	0.0163	0.0179	0.0212	0.0186	0.0186
SM (d18:1/23:1)	0.0041	0.0042	0.0043	0.0046	0.0058	0.0043	0.0047	0.005	0.006	0.0046	0.005
SM (d18:1/24:0)	0.0277	0.0292	0.039	0.0286	0.0441	0.0428	0.0297	0.0307	0.032	0.0342	0.0282
SM (d18:1/24:1)	0.0933	0.0979	0.1146	0.0953	0.1235	0.126	0.0942	0.1008	0.1254	0.0953	0.1049
SM (d18:1/24:2)	0.0129	0.0114	0.0152	0.0117	0.0165	0.0149	0.0138	0.0146	0.0162	0.0114	0.0134
High Starch
SM (d18:1/16:0)	0.0043	0.0049	0.0051	0.0034	0.0036	0.0046	0.0039	0.0053	0.0064	0.0054	0.0043
SM (d18:1/16:1)	0.0623	0.0902	0.084	0.0846	0.0673	0.0773	0.0772	0.0948	0.103	0.087	0.0872
SM (d18:1/16:2)	0.0027	0.0045	0.0039	0.0041	0.0025	0.0031	0.0028	0.0054	0.0047	0.0041	0.0049
SM (d18:1/17:0)	0.0081	0.0103	0.009	0.0074	0.0088	0.0081	0.0081	0.0081	0.0061	0.0086	0.0078
SM (d18:1/18:0)	0.2306	0.3077	0.2776	0.2665	0.2803	0.2631	0.2483	0.2742	0.2132	0.2421	0.2573
SM (d18:1/18:1)	0.0097	0.0124	0.0109	0.0111	0.0106	0.011	0.0097	0.013	0.01	0.0105	0.0137
SM (d18:1/19:0)	0.0082	0.0106	0.01	0.0073	0.0096	0.0072	0.0079	0.0067	0.0059	0.0087	0.0073
SM (d18:1/20:0)	0.014	0.0195	0.0199	0.0185	0.0182	0.0177	0.0184	0.0176	0.0206	0.0167	0.015
SM (d18:1/21:0)	0.0026	0.004	0.0038	0.0039	0.0032	0.0031	0.0029	0.0029	0.0042	0.0038	0.0033
SM (d18:1/22:0)	0.0314	0.0405	0.0501	0.0374	0.0328	0.0436	0.0415	0.0373	0.0467	0.0361	0.0324
SM (d18:1/22:1)	0.0057	0.0085	0.0084	0.009	0.0074	0.0086	0.0085	0.0081	0.0103	0.0082	0.0072
SM (d18:1/23:0)	0.0137	0.0176	0.0216	0.0185	0.0114	0.0193	0.0155	0.0139	0.0262	0.0205	0.0162
SM (d18:1/23:1)	0.0041	0.0059	0.0074	0.0052	0.0041	0.0054	0.005	0.005	0.0084	0.0058	0.0033
SM (d18:1/24:0)	0.0293	0.0395	0.0413	0.0403	0.0339	0.0413	0.0434	0.0305	0.0377	0.0347	0.0238
SM (d18:1/24:1)	0.077	0.1075	0.1335	0.1176	0.0897	0.112	0.1096	0.0863	0.135	0.1123	0.081
SM (d18:1/24:2)	0.0133	0.0167	0.0198	0.0171	0.0127	0.0159	0.0185	0.0152	0.0214	0.0148	0.0112
High fat
SM (d18:1/16:0)	0.0046	0.0044	0.0028	0.0039	0.0065	0.0031	0.0038	0.0037	0.0028
SM (d18:1/16:1)	0.0905	0.0786	0.067	0.0711	0.1091	0.0875	0.0695	0.086	0.0664
SM (d18:1/16:2)	0.0049	0.0029	0.0031	0.004	0.0046	0.0058	0.0036	0.0044	0.0029
SM (d18:1/17:0)	0.0114	0.0103	0.0112	0.0115	0.0127	0.0123	0.0092	0.0117	0.0105
SM (d18:1/18:0)	0.3115	0.2563	0.2824	0.2831	0.3374	0.3179	0.2715	0.2624	0.2882
SM (d18:1/18:1)	0.0139	0.0124	0.0111	0.0133	0.0161	0.0176	0.0138	0.0136	0.0159
SM (d18:1/19:0)	0.0057	0.0042	0.0054	0.0044	0.0063	0.0052	0.0048	0.0053	0.0052
SM (d18:1/20:0)	0.0306	0.02	0.0156	0.0153	0.0249	0.0183	0.0164	0.0147	0.014
SM (d18:1/21:0)	0.005	0.0029	0.003	0.0032	0.0045	0.003	0.0041	0.0045	0.0033
SM (d18:1/22:0)	0.0666	0.0444	0.0331	0.0351	0.0597	0.0423	0.0438	0.0377	0.0299
SM (d18:1/22:1)	0.0093	0.008	0.007	0.0062	0.0096	0.0068	0.008	0.0072	0.0051
SM (d18:1/23:0)	0.0227	0.0153	0.0107	0.0103	0.0221	0.0119	0.0149	0.0147	0.0103
SM (d18:1/23:1)	0.0049	0.0045	0.0043	0.0034	0.0069	0.0046	0.0051	0.0057	0.0046
SM (d18:1/24:0)	0.0854	0.0393	0.0297	0.0237	0.0724	0.0356	0.0261	0.0257	0.0255
SM (d18:1/24:1)	0.16	0.0977	0.0764	0.0701	0.1605	0.0888	0.0788	0.089	0.0612
SM (d18:1/24:2)	0.0246	0.0156	0.0119	0.012	0.0292	0.0165	0.0149	0.0162	0.0109

## Sheet: Supp Figure 1B
Muscle phosphatidylcholine levels
Chow
PC 14:0_18:0	0.01	0	0.01	0	0.02	0.01	0.02	0	0.01	0.02	0.01
PC 16:0_16:0	0.24	0.3	0.28	0.3	0.33	0.34	0.38	0.37	0.39	0.3	0.38
PC 16:0_16:1	0.25	0.32	0.22	0.29	0.31	0.3	0.27	0.35	0.25	0.34	0.38
PC 16:0_18:1	1.02	1.33	1.12	1.14	1.28	1.25	1.14	1.76	1.12	1.29	1.34
PC 16:0_18:2	0.57	0.57	0.5	0.6	0.56	0.69	0.52	0.93	0.54	0.57	0.55
PC 16:1_18:1	0.1	0.08	0.08	0.08	0.09	0.09	0.09	0.23	0.09	0.12	0.14
PC 16:1_18:2	0.03	0	0.01	0.03	0.01	0.01	0.02	0.08	0.05	0.03	0.01
PC 18:0_18:1	0.07	0.09	0.07	0.07	0.1	0.08	0.08	0.08	0.08	0.1	0.06
PC 18:0_18:2	0.08	0.06	0.06	0.05	0.08	0.07	0.08	0.13	0.09	0.06	0.06
PC 18:1_18:1	0.12	0.11	0.12	0.1	0.17	0.13	0.11	0.38	0.13	0.14	0.15
PC 16:0_20:3	0.07	0.1	0.06	0.09	0.09	0.08	0.08	0.06	0.08	0.08	0.07
PC 18:1_18:2	0.12	0.1	0.13	0.09	0.12	0.14	0.12	0.37	0.1	0.13	0.13
PC 16:0_20:4	1.02	1.22	1	1.12	1.32	1	0.91	0.73	1.1	1.41	1.14
PC 16:1_20:4	0.07	0	0.05	0.04	0.09	0.07	0.02	0.06	0.06	0.1	0.07
PC 16:0_22:4	0.01	0.01	0.01	0	0	0	0.01	0	0	0	0
PC 18:0_20:4	0.18	0.15	0.15	0.15	0.25	0.16	0.15	0.13	0.21	0.22	0.16
PC 16:0_22:5	0.18	0.33	0.25	0.27	0.2	0.23	0.3	0.16	0.1	0.27	0.33
PC 18:1_20:4	0.14	0.06	0.17	0.12	0.19	0.11	0.12	0.19	0.09	0.19	0.17
PC 16:0_22:6	4.01	4.5	4.28	4.61	5.09	5.1	4.58	2.63	4.76	5.2	5.13
PC 18:2_20:4	0.04	0.01	0.02	0.03	0.02	0.03	0.02	0.05	0.03	0.01	0.04
PC 16:1_22:6	0.17	0.2	0.18	0.18	0.24	0.19	0.18	0.19	0.2	0.27	0.26
PC 18:0_22:5	0.03	0	0.03	0.01	0.03	0.02	0.02	0.03	0.02	0.04	0.02
PC 18:0_22:6	0.49	0.39	0.49	0.44	0.68	0.64	0.61	0.3	0.68	0.67	0.58
PC 18:1_22:6	0.41	0.36	0.41	0.41	0.53	0.5	0.43	0.65	0.54	0.49	0.47
PC 18:2_22:6	0.18	0.15	0.18	0.18	0.22	0.2	0.21	0.21	0.22	0.22	0.23
High starch
PC 14:0_18:0	0.06	0.11	0.09	0.13	0.1	0.09	0.09	0.1	0.1	0.1	0.1
PC 16:0_16:0	0.12	0.15	0.11	0.12	0.1	0.12	0.18	0.16	0.09	0.13	0.15
PC 16:0_16:1	0.33	0.46	0.36	0.41	0.38	0.46	0.49	0.44	0.3	0.46	0.37
PC 16:0_18:1	1.07	1.38	1.37	1.31	1.15	1.35	1.33	1.47	1.02	1.44	1.29
PC 16:0_18:2	0.91	1.33	1.11	1.33	1.27	1.12	1.22	0.96	0.69	1.1	0.81
PC 16:1_18:1	0.1	0.2	0.18	0.17	0.13	0.2	0.18	0.24	0.12	0.23	0.17
PC 16:1_18:2	0.05	0.09	0.1	0.11	0.08	0.1	0.13	0.09	0.06	0.1	0.06
PC 18:0_18:1	0.09	0.11	0.09	0.08	0.05	0.08	0.1	0.1	0.14	0.09	0.07
PC 18:0_18:2	0.18	0.28	0.19	0.36	0.23	0.18	0.2	0.46	0.24	0.2	0.17
PC 18:1_18:1	0.17	0.19	0.21	0.11	0.16	0.21	0.2	0	0.11	0.23	0.13
PC 16:0_20:3	0.16	0.18	0.12	0.17	0.18	0.13	0.14	0.16	0.07	0.13	0.1
PC 18:1_18:2	0.14	0.25	0.25	0.26	0.21	0.2	0.3	0.24	0.22	0.22	0.15
PC 16:0_20:4	2.81	3.1	3.01	2.98	3.24	3	3.13	3.08	2.28	3.07	2.95
PC 16:1_20:4	0.16	0.22	0.19	0.14	0.17	0.21	0.22	0.18	0.17	0.19	0.16
PC 16:0_22:4	0.08	0.1	0.11	0.09	0.14	0.1	0.1	0.04	0.07	0.1	0.12
PC 18:0_20:4	0.44	0.65	0.51	0.69	0.56	0.46	0.61	0.57	0.66	0.62	0.46
PC 16:0_22:5	0.56	0.64	0.69	1.03	0.83	0.72	0.69	0.57	0.59	0.74	0.69
PC 18:1_20:4	0.34	0.46	0.41	0.4	0.37	0.48	0.4	0.52	0.3	0.45	0.38
PC 16:0_22:6	1.35	1.31	1.07	1.02	0.83	1.08	1.1	1.11	1.24	1.3	1.27
PC 18:2_20:4	0.08	0.11	0.14	0.13	0.13	0.13	0.15	0.1	0.09	0.13	0.12
PC 16:1_22:6	0.08	0.07	0.09	0.08	0.05	0.04	0.07	0.1	0.08	0.06	0.08
PC 18:0_22:5	0.1	0.18	0.18	0.3	0.18	0.16	0.15	0.12	0.25	0.26	0.15
PC 18:0_22:6	0.21	0.26	0.23	0.26	0.17	0.19	0.2	0.17	0.36	0.3	0.2
PC 18:1_22:6	0.11	0.15	0.13	0.13	0.08	0.1	0.13	0.16	0.14	0.12	0.12
PC 18:2_22:6	0.03	0.08	0.06	0.06	0.03	0.06	0.03	0.09	0.08	0.11	0.07
High fat
PC 14:0_18:0	0.08	0.06	0.04	0.07	0.09	0.05	0.09	0.08	0.05
PC 16:0_16:0	0.13	0.12	0.14	0.14	0.17	0.21	0.14	0.13	0.14
PC 16:0_16:1	0.21	0.23	0.23	0.24	0.3	0.33	0.3	0.37	0.31
PC 16:0_18:1	1.33	1.07	1.09	1.06	1.69	1.35	1.21	1.34	1.18
PC 16:0_18:2	1.43	1.31	1.19	1	1.77	1.63	1.24	1.47	1.16
PC 16:1_18:1	0.12	0.08	0.07	0.03	0.22	0.2	0.13	0.17	0.11
PC 16:1_18:2	0.08	0.06	0.06	0.05	0.15	0.13	0.04	0.09	0.07
PC 18:0_18:1	0.17	0.12	0.16	0.1	0.19	0.11	0.12	0.14	0.1
PC 18:0_18:2	0.52	0.42	0.44	0.22	0.6	0.43	0.3	0.43	0.31
PC 18:1_18:1	0.17	0.15	0.15	0.1	0.51	0.32	0.16	0.19	0.21
PC 16:0_20:3	0.14	0.11	0.24	0.12	0.12	0.13	0.14	0.15	0.12
PC 18:1_18:2	0.29	0.25	0.18	0.11	0.58	0.4	0.22	0.27	0.29
PC 16:0_20:4	3.01	2.24	2.82	2.8	2.05	2.51	2.91	3.11	2.3
PC 16:1_20:4	0.1	0.09	0.12	0.06	0.12	0.13	0.11	0.13	0.14
PC 16:0_22:4	0.14	0.1	0.14	0.11	0.07	0.08	0.1	0.1	0.08
PC 18:0_20:4	0.72	0.53	0.65	0.52	0.75	0.64	0.66	0.72	0.56
PC 16:0_22:5	0.74	0.53	0.61	0.57	0.4	0.45	0.57	0.5	0.49
PC 18:1_20:4	0.33	0.3	0.24	0.18	0.43	0.34	0.36	0.44	0.4
PC 16:0_22:6	1.64	1.3	1.57	1.43	0.9	1.05	1.69	1.64	1.23
PC 18:2_20:4	0.1	0.08	0.03	0.05	0.16	0.13	0.11	0.1	0.09
PC 16:1_22:6	0.05	0.07	0.03	0.03	0.07	0.06	0.08	0.07	0.04
PC 18:0_22:5	0.17	0.11	0.13	0.08	0.15	0.09	0.14	0.13	0.11
PC 18:0_22:6	0.33	0.26	0.26	0.19	0.25	0.29	0.35	0.39	0.21
PC 18:1_22:6	0.12	0.13	0.11	0.11	0.17	0.2	0.17	0.14	0.18
PC 18:2_22:6	0.09	0.06	0.06	0.07	0.09	0.09	0.08	0.08	0.08

## Sheet: Supp Figure 1C
Muslce phosphatidylethanolamine levels
Chow
PE 16:2	0.02	0.02	0	0	0.03	0	0.03	0.05	0	0.03	0.02
PE 18:1	0.03	0.02	0.02	0.02	0.05	0.04	0.01	0.04	0.04	0.04	0
PE 22:6	0.15	0.1	0.05	0.13	0.17	0.09	0.06	0.15	0.13	0.07	0.05
PE 16:0_18:1	0.02	0.02	0.02	0	0.02	0	0.03	0.03	0.02	0.01	0.02
PE 16:0_18:2	0.01	0	0.02	0.02	0.02	0.02	0.02	0.02	0.01	0	0.01
PE O-16:1_22:6	0.08	0.13	0.08	0	0.12	0.09	0.12	0.08	0.1	0.08	0.1
PE 18:0_18:2	0.03	0.03	0.05	0.04	0.03	0.05	0.04	0.05	0.06	0.07	0.04
PE 18:1_18:2	0.02	0.01	0.02	0	0.03	0.01	0.04	0.02	0.01	0.01	0.04
PE 16:0_20:4	0.04	0.04	0.03	0.03	0.04	0.02	0.04	0.01	0.04	0.03	0.03
PE 16:1_22:6	0.01	0.03	0.03	0.04	0.04	0.02	0.03	0.02	0.01	0.03	0.03
PE 16:0_22:4	0.01	0.01	0.01	0	0	0.01	0.01	0.01	0.01	0.01	0.01
PE 18:0_20:4	0.08	0.08	0.09	0.11	0.12	0.1	0.1	0.09	0.1	0.07	0.09
PE 16:0_22:5	0.04	0.04	0.03	0.02	0.06	0.06	0.03	0.02	0.03	0.07	0.07
PE 18:1_20:4	0.01	0	0.02	0.01	0.01	0	0.01	0.01	0	0.02	0.02
PE 16:0_22:6	0.77	0.94	0.9	1.03	1.14	0.8	0.98	0.5	0.61	0.86	1.17
PE 18:0_22:4	0.01	0	0	0	0.01	0.04	0.04	0.14	0	0	0.04
PE 18:0_22:5	1.17	0.61	1.05	1.26	1.38	1.2	1.27	0.77	1.34	1.32	1.21
PE 18:0_22:6	0.35	0.27	0.36	0.38	0.35	0.33	0.34	0.41	0.31	0.35	0.44
PE 18:1_22:5	0	0	0.01	0	0.01	0.01	0.01	0.01	0	0	0.01
PE 18:1_22:6	0.12	0.11	0.11	0.13	0.13	0.13	0.13	0.12	0.08	0.12	0.12
PE 18:2_22:6	0.02	0.02	0.02	0.01	0.06	0.01	0.03	0.03	0.03	0.03	0.04
High Starch
PE 16:2	0.03	0.01	0.03	0.03	0.02	0.02	0.01	0.05	0.04	0.03	0.03
PE 18:1	0.04	0.04	0.03	0.03	0.03	0.01	0.04	0.01	0.06	0.02	0.02
PE 22:6	0.06	0.07	0.05	0.05	0.05	0.02	0.04	0.04	0.08	0.04	0.05
PE 16:0_18:1	0.03	0.02	0.02	0.01	0.02	0.02	0.02	0.05	0.01	0.04	0.02
PE 16:0_18:2	0.05	0.06	0.05	0.06	0.06	0.03	0.04	0.08	0.04	0.02	0.04
PE O-16:1_22:6	0.08	0.12	0.05	0.04	0.06	0.07	0.07	0.1	0	0.08	0.06
PE 18:0_18:2	0.1	0.09	0.07	0.1	0.08	0.08	0.07	0.08	0.06	0.08	0.05
PE 18:1_18:2	0	0.04	0.04	0.04	0.01	0.02	0.03	0.03	0.02	0.05	0.03
PE 16:0_20:4	0.09	0.11	0.14	0.13	0.12	0.13	0.1	0.1	0.13	0.1	0.12
PE 16:1_22:6	0	0.04	0.01	0.03	0.01	0.01	0.02	0.01	0.03	0.02	0.01
PE 16:0_22:4	0.02	0.02	0.01	0.03	0.03	0.03	0.02	0.07	0	0	0.04
PE 18:0_20:4	0.37	0.5	0.44	0.42	0.41	0.36	0.44	0.38	0.5	0.43	0.4
PE 16:0_22:5	0.34	0.33	0.41	0.46	0.45	0.39	0.3	0.39	0.26	0.38	0.44
PE 18:1_20:4	0.06	0.09	0.06	0.09	0.07	0.07	0.11	0.06	0.1	0.11	0.09
PE 16:0_22:6	0.71	0.5	0.43	0.34	0.38	0.4	0.45	0.43	0.57	0.5	0.59
PE 18:0_22:4	0.04	0.09	0.05	0.02	0.05	0.05	0.06	0.06	0.07	0.08	0.1
PE 18:0_22:5	0.91	0.87	0.76	0.88	0.65	0.7	0.72	0.8	1.04	0.92	0.83
PE 18:0_22:6	0.25	0.25	0.2	0.22	0.15	0.2	0.19	0.22	0.27	0.24	0.23
PE 18:1_22:5	0.05	0.06	0.07	0.07	0.05	0.06	0.06	0.05	0.04	0.05	0.05
PE 18:1_22:6	0.12	0.07	0.06	0.03	0.05	0.05	0.07	0.08	0.07	0.08	0.06
PE 18:2_22:6	0.03	0.03	0.02	0.03	0.02	0.03	0.03	0.01	0.03	0.03	0.02
High Fat
PE 16:2	0	0.02	0.02	0.01	0.04	0	0.02	0.01	0.02
PE 18:1	0	0.02	0.05	0.01	0.07	0.01	0	0.03	0.03
PE 22:6	0	0.06	0.07	0.05	0.06	0	0.05	0.04	0.06
PE 16:0_18:1	0.03	0.02	0.01	0.02	0.04	0	0.01	0.03	0.02
PE 16:0_18:2	0.05	0.06	0.05	0.04	0.05	0.07	0.04	0.04	0.04
PE O-16:1_22:6	0.06	0.06	0.05	0.08	0	0.07	0.09	0.11	0.05
PE 18:0_18:2	0.19	0.15	0.19	0.14	0.2	0.13	0.13	0.21	0.09
PE 18:1_18:2	0.04	0.02	0.05	0.02	0.07	0.11	0.04	0.06	0.01
PE 16:0_20:4	0.1	0.12	0.13	0.09	0.08	0.06	0.12	0.13	0.06
PE 16:1_22:6	0.02	0.01	0	0.01	0	0	0	0.02	0
PE 16:0_22:4	0.03	0.02	0.04	0.01	0.02	0	0.02	0	0.01
PE 18:0_20:4	0.72	0.55	0.52	0.46	0.54	0.55	0.47	0.83	0.38
PE 16:0_22:5	0.24	0.27	0.25	0.22	0.12	0.17	0.24	0.26	0.18
PE 18:1_20:4	0.08	0.06	0.05	0.05	0.08	0.07	0.08	0.13	0.07
PE 16:0_22:6	0.64	0.58	0.56	0.65	0.31	0.41	0.67	0.68	0.38
PE 18:0_22:4	0.17	0.12	0.13	0.13	0.14	0.19	0.11	0.1	0.05
PE 18:0_22:5	1.19	1.05	0.87	0.92	0.94	0.98	1.1	1.18	0.79
PE 18:0_22:6	0.25	0.23	0.22	0.24	0.26	0.29	0.29	0.33	0.18
PE 18:1_22:5	0.02	0.02	0	0.01	0.04	0.03	0.03	0.03	0.02
PE 18:1_22:6	0.11	0.08	0.07	0.08	0.05	0.14	0.11	0.11	0.06
PE 18:2_22:6	0.05	0.03	0.03	0.02	0.02	0.06	0.05	0.05	0.02

## Sheet: Supp Figure 1D
Muscle phosphatidylserine levels
Chow
PS 18:0_18:1	0.06	0.02	0.05	0.04	0.06	0.04	0.05	0.06	0.05	0.02	0.06
PS 18:0_20:4	0	0	0	0	0.01	0	0	0	0	0.02	0.01
PS 16:0_22:6	0.06	0.06	0.06	0.06	0.07	0.06	0.05	0.02	0.02	0.02	0.1
PS 18:0_22:5	0.03	0	0.03	0.02	0.03	0	0	0.01	0	0	0
PS 18:0_22:6	0.29	0.24	0.31	0.28	0.27	0.25	0.32	0.35	0.34	0.31	0.29
High Starch
PS 18:0_18:1	0.03	0.06	0.07	0.07	0.05	0.06	0.05	0.05	0.03	0.05	0.03
PS 18:0_20:4	0.02	0.03	0.02	0.02	0.01	0.02	0.03	0.04	0.04	0.02	0.02
PS 16:0_22:6	0.04	0.03	0.03	0	0.02	0.03	0.02	0.03	0.03	0.03	0.02
PS 18:0_22:5	0.12	0.2	0.18	0.24	0.21	0.2	0.18	0.2	0.13	0.16	0.15
PS 18:0_22:6	0.13	0.19	0.13	0.11	0.11	0.17	0.13	0.17	0.15	0.12	0.13
High Fat
PS 18:0_18:1	0.12	0.04	0.02	0.02	0.11	0.03	0.04	0.03	0.04
PS 18:0_20:4	0.03	0.04	0.03	0.01	0.02	0.03	0.03	0.04	0
PS 16:0_22:6	0.02	0.02	0.03	0	0	0	0.03	0.06	0
PS 18:0_22:5	0.12	0.13	0.1	0.12	0.14	0.18	0.13	0.15	0.16
PS 18:0_22:6	0.22	0.22	0.19	0.16	0.22	0.2	0.23	0.3	0.17
