# Supplementary material for: Insulin sensitivity is preserved in mice made obese by feeding a high starch diet
Source: eLife. 2022 Nov 17;11:e79250. doi: 10.7554/eLife.79250 (PMC9711519; doi:10.7554/eLife.79250)
Supplement: Figure 6—figure supplement 2—source data 1. [file elife-79250-fig6-figsupp2-data1.xlsx]

## Sheet: Supp Figure 2A
Liver sphingomyelin levels
Chow
SM (d18:1/15:0)	0.02	0.01	0.01	0.01	0.01	0.01	0.01	0.01	0.03	0.01	0.01
SM (d18:1/16:0)	0.3	0.29	0.31	0.26	0.26	0.27	0.48	0.64	0.84	0.25	0.29
SM (d18:1/18:0)	0.04	0.04	0.04	0.04	0.04	0.04	0.06	0.08	0.11	0.03	0.04
SM (d18:1/20:0)	0.04	0.04	0.03	0.05	0.04	0.04	0.06	0.06	0.06	0.04	0.06
SM (d18:1/21:0)	0.02	0.02	0.02	0.03	0.02	0.02	0.02	0.01	0.02	0.03	0.03
SM (d18:1/22:0)	0.3	0.3	0.32	0.44	0.19	0.27	0.43	0.3	0.32	0.41	0.46
SM (d18:1/22:1)	0.08	0.08	0.06	0.13	0.05	0.07	0.09	0.04	0.05	0.09	0.06
SM (d18:1/23:0)	0.18	0.14	0.21	0.17	0.14	0.16	0.17	0.11	0.15	0.22	0.17
SM (d18:1/23:1)	0.06	0.04	0.06	0.06	0.05	0.05	0.05	0.03	0.03	0.06	0.04
SM (d18:1/24:0)	0.29	0.22	0.33	0.27	0.21	0.28	0.34	0.22	0.23	0.3	0.28
SM (d18:1/24:1)	0.76	0.71	0.82	0.79	0.74	0.71	0.98	0.9	0.88	0.72	0.76
SM (d18:1/24:2)	0.07	0.07	0.07	0.07	0.08	0.07	0.1	0.1	0.09	0.06	0.06
SM (d18:1/25:0)	0.02	0.02	0.02	0.01	0.01	0.02	0.02	0.01	0.01	0.02	0.02
High Strach
SM (d18:1/15:0)	0.01	0.02	0.01	0.02	0.01	0.01	0.01	0.02	0.01	0.01	0.01
SM (d18:1/16:0)	0.3	0.36	0.3	0.39	0.29	0.32	0.41	0.87	0.37	0.3	0.45
SM (d18:1/18:0)	0.06	0.06	0.05	0.1	0.06	0.05	0.08	0.15	0.1	0.04	0.09
SM (d18:1/20:0)	0.08	0.08	0.07	0.11	0.09	0.06	0.11	0.13	0.08	0.05	0.13
SM (d18:1/21:0)	0.03	0.03	0.03	0.03	0.04	0.02	0.03	0.02	0.01	0.02	0.03
SM (d18:1/22:0)	0.4	0.48	0.42	0.48	0.56	0.29	0.72	0.57	0.3	0.3	0.58
SM (d18:1/22:1)	0.11	0.08	0.11	0.08	0.1	0.1	0.11	0.07	0.04	0.09	0.08
SM (d18:1/23:0)	0.14	0.12	0.13	0.18	0.16	0.13	0.16	0.09	0.08	0.13	0.16
SM (d18:1/23:1)	0.05	0.03	0.04	0.04	0.04	0.04	0.04	0.02	0.02	0.04	0.03
SM (d18:1/24:0)	0.23	0.19	0.17	0.22	0.24	0.16	0.26	0.22	0.12	0.19	0.22
SM (d18:1/24:1)	0.65	0.49	0.53	0.58	0.54	0.53	0.67	0.64	0.43	0.65	0.73
SM (d18:1/24:2)	0.07	0.05	0.06	0.06	0.06	0.06	0.07	0.07	0.05	0.06	0.06
SM (d18:1/25:0)	0.01	0.01	0.01	0.01	0.01	0.01	0.01	0.01	0.01	0.01	0.01
High fat
SM (d18:1/15:0)	0.02	0.02	0.01	0.02	0.01	0.02	0.01	0.01	0.01
SM (d18:1/16:0)	0.43	0.44	0.34	0.45	0.81	0.62	0.22	0.39	0.37
SM (d18:1/18:0)	0.13	0.09	0.14	0.11	0.16	0.12	0.07	0.12	0.11
SM (d18:1/20:0)	0.16	0.12	0.16	0.13	0.08	0.1	0.06	0.16	0.13
SM (d18:1/21:0)	0.05	0.03	0.04	0.03	0.01	0.02	0.01	0.03	0.03
SM (d18:1/22:0)	0.76	0.6	0.68	0.56	0.36	0.48	0.27	0.6	0.47
SM (d18:1/22:1)	0.1	0.08	0.07	0.08	0.04	0.04	0.02	0.09	0.06
SM (d18:1/23:0)	0.15	0.12	0.13	0.1	0.07	0.08	0.07	0.13	0.1
SM (d18:1/23:1)	0.04	0.03	0.03	0.03	0.02	0.02	0.01	0.03	0.03
SM (d18:1/24:0)	0.24	0.19	0.18	0.16	0.18	0.17	0.11	0.18	0.16
SM (d18:1/24:1)	0.56	0.46	0.45	0.4	0.59	0.52	0.31	0.47	0.4
SM (d18:1/24:2)	0.06	0.05	0.05	0.05	0.1	0.08	0.03	0.05	0.05
SM (d18:1/25:0)	0.01	0.01	0.01	0.01	0.01	0.01	0.01	0.01	0.01

## Sheet: Supp Figure 2B
Liver phosphatidylcholine levels
Chow
PC 16:0_16:0	0.42	0.42	0.44	0.32	0.4	0.4	0.61	0.75	0.62	0.34	0.4
PC 16:0_16:1	0.17	0.23	0.24	0.2	0.13	0.17	0.31	0.11	0.17	0.33	0.12
PC (16:0_18:1	3.1	3.23	3.12	3.48	2.4	2.62	4.38	2.33	2.98	3.19	2.23
PC )16:0_18:2	4.77	4.33	4.48	3.85	3.83	3.72	4.57	3.54	4.45	4.47	4.35
PC 16:1_18:1	0.51	0.35	0.47	0.49	0.25	0.42	0.4	0.1	0.12	0.6	0.19
PC (16:1_18:2	0.38	0.24	0.31	0.28	0.16	0.33	0.2	0.05	0.1	0.37	0.15
PC 18:0_18:1	0.5	0.41	0.41	0.61	0.32	0.35	0.78	0.36	0.54	0.38	0.36
PC 16:0_20:2	0.2	0.16	0.24	0.24	0.13	0.18	0.32	0.21	0.42	0.25	0.29
PC 18:0_18:2	1.95	1.61	1.73	1.87	1.42	1.37	2.58	1.93	2.05	1.56	2.65
PC 18:1_18:1	0.75	0.52	0.75	0.79	0.58	0.82	0.78	0.31	0.33	0.58	0.33
PC 16:0_20:3	0.38	0.57	0.61	0.67	0.53	0.56	0.52	0.15	0.14	0.58	0.5
PC 18:1_18:2	1.92	1.14	1.5	1.54	1.19	1.93	1.08	0.48	0.62	1.55	1.04
PC 16:0_20:4	2.83	3.18	2.86	3.02	3.4	2.55	1.98	1.3	1.92	3.34	3.29
PC 16:0_20:5	0.48	0.39	0.41	0.39	0.45	0.4	0.44	0.42	0.24	0.54	0.28
PC 18:0_20:3	0.23	0.28	0.27	0.49	0.26	0.17	0.33	0.11	0.07	0.23	0.27
PC 18:0_20:4	1.7	1.62	1.41	1.95	1.71	1.11	1.27	1.13	1.73	1.29	2.57
PC 16:0_22:5	0.07	0.07	0.1	0.02	0.05	0.07	0.05	0.07	0.03	0.06	0.05
PC 18:1_20:4	1.22	0.76	0.92	1.04	0.89	0.9	0.4	0.19	0.31	0.88	0.73
PC 16:0_22:6	3.73	4.35	3.76	4.5	3.64	3.2	4.12	3.82	3.94	4.13	4.07
PC 18:2_20:4	0.21	0.13	0.21	0.23	0.11	0.16	0.07	0.02	0.04	0.19	0.19
PC 18:0_22:6	0.98	1.02	0.9	1.36	0.84	0.87	1.49	1.84	2.13	0.81	1.47
PC 18:1_22:6	1.23	0.88	1.11	1.39	0.93	1.25	0.72	0.51	0.49	1.01	0.82
High Starch
PC 16:0_16:0	0.33	0.36	0.28	0.31	0.32	0.27	0.32	0.46	0.38	0.34	0.44
PC 16:0_16:1	0.19	0.09	0.19	0.16	0.13	0.12	0.15	0.29	0.04	0.12	0.12
PC (16:0_18:1	3.19	2.22	2.97	2.82	2.72	2.78	3.03	3.93	1.86	2.24	2.97
PC )16:0_18:2	3.91	4.03	3.63	5.36	5.55	3.14	5.09	5.29	2.46	2.86	4.79
PC 16:1_18:1	0.47	0.13	0.3	0.11	0.16	0.29	0.17	0.21	0.06	0.26	0.15
PC (16:1_18:2	0.3	0.13	0.19	0.15	0.13	0.21	0.17	0.13	0.04	0.15	0.08
PC 18:0_18:1	0.4	0.33	0.29	0.32	0.31	0.43	0.43	0.54	0.24	0.28	0.43
PC 16:0_20:2	0.12	0.2	0.12	0.2	0.18	0.09	0.12	0.13	0.06	0.13	0.26
PC 18:0_18:2	1.48	2.04	1.16	1.75	1.6	1.2	1.95	2.53	1.15	0.76	2.39
PC 18:1_18:1	0.52	0.25	0.34	0.25	0.28	0.47	0.34	0.34	0.2	0.47	0.28
PC 16:0_20:3	0.3	0.23	0.28	0.14	0.17	0.17	0.17	0.14	0.33	0.3	0.47
PC 18:1_18:2	0.87	0.69	0.65	0.45	0.65	0.65	0.5	0.35	0.31	0.76	0.63
PC 16:0_20:4	5.07	4.92	5.59	5.78	5.49	4.23	5.93	3.16	5.25	5.48	6.98
PC 16:0_20:5	0.01	0.02	0	0.03	0.01	0	0	0	0.01	0	0.02
PC 18:0_20:3	0.19	0.12	0.11	0.01	0.07	0.13	0.11	0.11	0.1	0.11	0.18
PC 18:0_20:4	3.87	4.93	3.69	4.88	3.91	4.36	5.23	3.17	4.64	3.59	7.26
PC 16:0_22:5	0.3	0.46	0.64	0.63	0.63	0.54	0.49	0.35	0.23	0.66	0.46
PC 18:1_20:4	1.66	1.17	1.55	1.04	1.23	1.65	1.1	0.37	0.84	1.83	1.39
PC 16:0_22:6	2.02	2.12	1.94	2.43	2.07	1.69	3.02	2.13	2.54	1.91	3.51
PC 18:2_20:4	0.29	0.32	0.21	0.23	0.32	0.2	0.28	0.05	0.14	0.25	0.28
PC 18:0_22:6	0.66	0.78	0.49	0.82	0.52	0.61	1.12	1.3	0.9	0.41	1.31
PC 18:1_22:6	0.52	0.36	0.39	0.34	0.3	0.45	0.51	0.2	0.33	0.51	0.55
high fat
PC 16:0_16:1	0.42	0.39	0.33	0.3	1.08	0.8	0.15	0.35	0.34
PC (16:0_18:1	0.11	0.11	0.08	0.09	0.12	0.14	0.02	0.11	0.08
PC )16:0_18:2	4.16	3.29	3.09	2.53	2.43	2.51	1.01	4.39	2.65
PC 16:1_18:1	6.09	4.1	5.72	4.48	4.1	4.05	1.94	5.59	4.32
PC (16:1_18:2	0.19	0.29	0.09	0.13	0.08	0.13	0.04	0.19	0.17
PC 18:0_18:1	0.17	0.17	0.11	0.16	0.07	0.1	0.04	0.15	0.12
PC 16:0_20:2	0.38	0.45	0.33	0.25	0.38	0.36	0.18	0.41	0.27
PC 18:0_18:2	0.18	0.17	0.22	0.26	0.19	0.23	0.1	0.28	0.37
PC 18:1_18:1	1.67	2.14	1.86	1.35	1.7	1.82	1.46	1.53	1.47
PC 16:0_20:3	0.29	0.38	0.19	0.2	0.24	0.24	0.1	0.31	0.2
PC 18:1_18:2	0.15	0.45	0.21	0.22	0.17	0.2	0.12	0.31	0.48
PC 16:0_20:4	0.57	0.58	0.32	0.4	0.38	0.33	0.2	0.5	0.43
PC 16:0_20:5	4.48	5.07	4.69	4.63	2.48	3.32	2.81	5.16	7.22
PC 18:0_20:3	0.04	0.02	0.02	0.06	0.03	0.1	0.04	0.06	0.02
PC 18:0_20:4	0.1	0.32	0.02	0.05	0.1	0.09	0.07	0.18	0.11
PC 16:0_22:5	4.39	4.76	4.43	4.35	3.06	3.29	3.51	4.02	5.39
PC 18:1_20:4	0.36	0.27	0.23	0.2	0.15	0.13	0.11	0.36	0.23
PC 16:0_22:6	0.85	0.99	0.59	0.6	0.3	0.38	0.43	0.75	0.98
PC 18:2_20:4	3.95	3.02	3.62	3.3	2.74	2.82	2.72	4.46	4.56
PC 18:0_22:6	0.2	0.26	0.19	0.14	0.04	0.05	0.13	0.14	0.27
PC 18:1_22:6	1.3	0.99	1.34	1.12	1.36	1.39	1.14	1.23	1.13
	0.56	0.52	0.4	0.38	0.21	0.26	0.28	0.56	0.54

## Sheet: Supp Figure 2C
Liver phosphatidylethanolamine levels
Chow
PE 16:0_18:1	0.13	0.12	0.21	0.16	0.13	0.14	0.23	0.05	0.11	0.12	0.07
PE 16:0_18:2	0.46	0.42	0.55	0.4	0.33	0.4	0.35	0.29	0.44	0.49	0.34
PE 18:0_18:2	0.29	0.29	0.3	0.31	0.2	0.23	0.41	0.34	0.38	0.26	0.36
PE 18:1_18:2	0.51	0.35	0.49	0.48	0.34	0.53	0.31	0.09	0.23	0.44	0.29
PE 16:0_20:4	0.91	1	1	1.08	0.84	0.87	0.83	0.45	0.6	1.23	0.77
PE 16:1_22:6	0.15	0.13	0.08	0.1	0.07	0.11	0.08	0.03	0.05	0.21	0.1
PE 18:0_20:4	2.32	2.11	2.23	2.53	1.58	1.73	2.12	1.52	2.12	2.23	2.37
PE 16:0_22:5	0.03	0.06	0.06	0.02	0.03	0.03	0.05	0.03	0.03	0.05	0.02
PE 18:1_20:4	1.29	0.9	1.12	1.29	0.85	1.14	0.6	0.27	0.36	1	0.85
PE 16:0_22:6	3.39	3.17	2.88	3.74	2.46	2.51	2.95	3.53	4.59	3.17	2.69
PE 18:0_22:5	0.01	0.04	0.02	0.01	0.01	0	0.04	0.07	0.05	0.03	0.01
PE 18:0_22:6	0.64	0.64	0.47	0.9	0.52	0.6	0.95	1.98	2.26	0.46	0.75
PE 18:1_22:5	0.06	0.03	0.03	0.09	0.03	0.03	0.03	0.03	0.02	0.05	0.02
PE 18:1_22:6	1.38	1.04	0.97	1.55	0.98	1.12	0.76	0.67	0.91	1.01	0.89
High Starch
PE 16:0_18:1	0.13	0.11	0.12	0.09	0.13	0.11	0.1	0.24	0.08	0.15	0.14
PE 16:0_18:2	0.49	0.48	0.49	0.77	0.73	0.36	0.57	0.8	0.21	0.37	0.5
PE 18:0_18:2	0.31	0.38	0.23	0.53	0.45	0.21	0.3	0.5	0.19	0.17	0.41
PE 18:1_18:2	0.3	0.23	0.27	0.24	0.42	0.25	0.19	0.17	0.13	0.29	0.28
PE 16:0_20:4	1.26	1.16	1.36	1.39	1.39	1.09	1.28	1.11	1.04	1.29	1.3
PE 16:1_22:6	0.1	0.08	0.11	0.09	0.08	0.07	0.07	0.02	0.06	0.06	0.11
PE 18:0_20:4	3.39	3.24	3.12	4.4	3.76	2.8	3.58	3.81	2.74	2.07	3.73
PE 16:0_22:5	0.37	0.46	0.67	0.57	0.49	0.48	0.5	0.48	0.25	0.59	0.33
PE 18:1_20:4	1.73	1.25	1.73	1.37	1.45	1.61	1.44	0.64	1.16	1.97	1.47
PE 16:0_22:6	2.73	2.41	2.23	2.68	2.04	1.96	3.53	2.91	2.34	2.28	3.25
PE 18:0_22:5	0.12	0.13	0.23	0.23	0.19	0.21	0.28	0.27	0.14	0.14	0.16
PE 18:0_22:6	0.53	0.59	0.52	0.82	0.57	0.53	1.13	1.43	0.82	0.4	1.05
PE 18:1_22:5	0.2	0.16	0.36	0.18	0.21	0.38	0.19	0.08	0.12	0.3	0.11
PE 18:1_22:6	1.01	0.69	0.89	0.83	0.64	0.75	0.94	0.48	0.69	0.97	0.95
High Fat
PE 16:0_18:1	0.17	0.14	0.14	0.11	0.1	0.15	0.02	0.22	0.07
PE 16:0_18:2	0.86	0.38	0.78	0.5	0.36	0.51	0.1	0.64	0.29
PE 18:0_18:2	0.51	0.41	0.45	0.38	0.39	0.42	0.19	0.37	0.23
PE 18:1_18:2	0.27	0.2	0.24	0.13	0.13	0.12	0.07	0.3	0.19
PE 16:0_20:4	1.23	1.16	1.14	0.99	0.71	1.1	0.56	1.28	1.26
PE 16:1_22:6	0.09	0.09	0.06	0.1	0.02	0.06	0.05	0.1	0.1
PE 18:0_20:4	4.32	3.37	3.85	3.39	2.77	3.07	1.95	3.67	3.59
PE 16:0_22:5	0.38	0.36	0.29	0.19	0.16	0.2	0.07	0.3	0.18
PE 18:1_20:4	1.25	1.04	1.05	0.99	0.4	0.59	0.49	1.16	1.32
PE 16:0_22:6	3.87	2.83	3.5	3.38	3.54	3.9	1.98	3.9	3.89
PE 18:0_22:5	0.17	0.1	0.1	0.08	0.09	0.15	0.03	0.11	0.09
PE 18:0_22:6	1.2	0.71	1.09	1.04	1.89	1.94	0.66	1.23	1
PE 18:1_22:5	0.11	0.1	0.04	0.02	0.03	0.03	0.01	0.08	0.12
PE 18:1_22:6	0.93	0.82	0.83	0.77	0.6	0.81	0.43	1.13	1.14

## Sheet: Supp Figure 2D
Liver phosphatidylserine levels
Chow
PS 18:0_18:1	0.03	0.04	0.06	0.05	0.03	0.05	0.06	0.06	0.04	0.04	0.04
PS 18:0_18:2	0.06	0.02	0.03	0.02	0.01	0.02	0.06	0.05	0.07	0.03	0.02
PS 16:0_20:4	0.1	0.06	0.09	0.06	0.05	0.06	0.04	0.06	0.03	0.09	0.09
PS 18:0_20:4	0.78	0.46	0.54	0.59	0.44	0.35	0.5	0.49	0.63	0.48	0.78
PS 18:0_20:5	0.04	0.03	0.03	0.05	0.01	0.05	0.03	0.05	0.04	0.02	0.03
PS 18:1_20:4	0.04	0.02	0.06	0.03	0.02	0.05	0.02	0.01	0.01	0.05	0.03
PS 16:0_22:6	0.13	0.07	0.17	0.13	0.08	0.11	0.12	0.06	0.07	0.14	0.09
PS 18:0_22:5	0	0.01	0	0	0	0	0	0.04	0	0	0
PS 18:0_22:6	0.66	0.51	0.66	0.59	0.46	0.53	0.49	0.61	0.77	0.4	0.52
PS 18:1_22:6	0.06	0.02	0.05	0.03	0.03	0.05	0.01	0	0.03	0.05	0.02
High Starch
PS 18:0_18:1	0.06	0.02	0.02	0.03	0.02	0.04	0.03	0.07	0.03	0.04	0.03
PS 18:0_18:2	0.02	0.01	0.01	0	0.01	0.04	0	0.06	0	0	0.02
PS 16:0_20:4	0.12	0.07	0.11	0.09	0.14	0.09	0.06	0.1	0.05	0.11	0.08
PS 18:0_20:4	1.15	0.92	0.81	1.04	0.98	1.04	0.89	1.01	0.7	0.84	1.16
PS 18:0_20:5	0	0	0	0	0	0.01	0	0	0	0	0
PS 18:1_20:4	0.03	0.03	0.04	0.02	0.03	0.02	0.02	0.01	0	0.05	0.02
PS 16:0_22:6	0.07	0.05	0.05	0.05	0.07	0.03	0.07	0.06	0.03	0.03	0.06
PS 18:0_22:5	0.07	0.09	0.1	0.08	0.15	0.08	0.09	0.14	0.03	0.08	0.08
PS 18:0_22:6	0.26	0.17	0.18	0.2	0.19	0.21	0.28	0.41	0.21	0.16	0.34
PS 18:1_22:6	0.03	0	0	0.02	0	0	0.02	0	0	0.02	0.01
High fat
PS 18:0_18:1	0.04	0.04	0.04	0.05	0.08	0.04	0.02	0.03	0
PS 18:0_18:2	0.02	0.01	0	0.03	0.08	0.04	0.01	0	0.01
PS 16:0_20:4	0.09	0.09	0.1	0.09	0.06	0.08	0.03	0.06	0.08
PS 18:0_20:4	1.3	1.03	1.13	0.89	0.97	1.05	0.59	0.98	1.06
PS 18:0_20:5	0.01	0.01	0	0	0	0	0	0	0
PS 18:1_20:4	0.02	0.03	0	0	0.04	0.02	0	0	0.02
PS 16:0_22:6	0.09	0.03	0.08	0.05	0.04	0.04	0.04	0.14	0.09
PS 18:0_22:5	0.05	0.07	0.04	0.02	0.06	0.04	0	0.03	0.04
PS 18:0_22:6	0.37	0.27	0.4	0.3	0.5	0.42	0.2	0.49	0.36
PS 18:1_22:6	0.03	0.01	0	0.01	0.01	0.02	0	0	0.03

## Sheet: Supp Figure 2E
Liver cholesterol ester content
Chow
CE 16:0	0.09012	0.06733	0.04158	0.21394	0.21404	0.06101	0.11496	0.24566	0.42158	0.11176	0.22759
CE 16:1	0.17017	0.09885	0.07374	0.29297	0.40786	0.14702	0.12413	0.09828	0.17938	0.17042	0.24693
CE 17:0	0	0.0043	0	0.03319	0.0158	0.01094	0	0.00329	0.0478	0.01729	0.00231
CE 17:1	0.00499	0.01496	0	0.02223	0.02967	0	0.00508	0	0.01799	0	0.02164
CE 18:0	0.02501	0	0.00734	0.01899	0.00549	0	0	0.03483	0.13883	0.05352	0.02376
CE 18:1	0.98213	0.56466	0.4487	1.34792	1.97993	0.83289	0.52768	1.32052	1.35482	0.57057	1.4921
CE 18:2	0.27023	0.14825	0.12855	0.24295	0.35255	0.20167	0.20441	0.47336	0.48201	0.15043	0.38319
CE 20:4	0.03654	0.04966	0.03177	0.05482	0.0694	0.04017	0.05817	0.08729	0.17666	0.04882	0.08462
CE 22:6	0.06325	0.06897	0.03039	0.07449	0.10948	0.05946	0.0541	0.34062	0.2535	0.07656	0.08614
High Starch
CE 16:0	0.34361	0.75127	0.5832	0.46071	0.41342	0.53807	0.52576	0.37549	1.14829	1.51126	1.15748
CE 16:1	0.83062	1.12079	1.07527	0.64297	0.62946	1.23093	0.81573	0.42923	1.33471	2.9669	1.40892
CE 17:0	0.05451	0.04553	0.0312	0.0224	0.01854	0.0583	0.04711	0.01331	0.04349	0.09023	0.07883
CE 17:1	0.0563	0.08208	0.08098	0.02394	0.02741	0.0746	0.0451	0.01472	0.07181	0.14923	0.09794
CE 18:0	0.04698	0.09793	0.05532	0.06438	0.06744	0.08901	0.09414	0.03085	0.11051	0.10428	0.159
CE 18:1	3.24029	5.50299	4.5338	2.82614	2.73842	5.05312	4.01107	1.4978	4.99185	9.5012	5.16984
CE 18:2	0.60832	1.19635	0.8388	0.84186	0.80236	0.90868	1.02176	0.38277	1.05594	1.80092	1.135
CE 20:4	0.21914	0.33373	0.2588	0.28326	0.246	0.28958	0.23572	0.39641	0.4028	0.35276	0.3283
CE 22:6	0.06493	0.10399	0.07471	0.08298	0.04078	0.08747	0.12742	0.12355	0.21679	0.19305	0.17149
High Fat
CE 16:0	0.29919	0.19488	0.3799	0.33081	0.54781	0.64441	0.28736	0.60361	0.66661
CE 16:1	0.20596	0.23067	0.24812	0.27878	0.38632	0.6211	0.19947	0.40277	0.46669
CE 17:0	0.01756	0	0.01633	0.01957	0.02801	0.04261	0.03093	0.04605	0.03989
CE 17:1	0.01339	0.02901	0.01401	0.02012	0.033	0.04803	0.0296	0.04756	0.06275
CE 18:0	0.07094	0.05248	0.12825	0.0386	0.09776	0.05955	0.05416	0.11547	0.11581
CE 18:1	2.16262	1.4518	1.93485	1.765	2.57088	3.0485	1.54196	4.06019	3.36456
CE 18:2	0.60053	0.40603	0.62654	0.49042	0.79525	1.00896	0.45068	0.88982	0.7615
CE 20:4	0.22389	0.17607	0.19714	0.20694	0.3512	0.4366	0.15175	0.22083	0.23363
CE 22:6	0.0785	0.07055	0.08693	0.08446	0.32411	0.35734	0.1368	0.12455	0.13151
