# Supplementary material for: Insulin sensitivity is preserved in mice made obese by feeding a high starch diet
Source: eLife. 2022 Nov 17;11:e79250. doi: 10.7554/eLife.79250 (PMC9711519; doi:10.7554/eLife.79250)
Supplement: Figure 6—source data 1. [file elife-79250-fig6-data1.xlsx]

## Sheet: Figure 6A
Muscle Total lipid levels
Chow
Total Cer	0.056	0.0525	0.0493	0.0506	0.0661	0.0539	0.0564	0.0802	0.0801	0.0547	0.0501
Total DAG	0.17	0.14	0.09	0.22	0.64	0.04	0.48	0.56	0.71	0.74	0.52
Total TAG	5.19	9.15	7.28	13.17	20.33	8.37	13.25	9.31	33.35	11.27	25.67
Total PC	9.57	10.45	9.9	10.4	12	11.47	10.47	10.04	10.92	12.3	11.91
Total SM	0.5564	0.5596	0.65	0.5339	0.6949	0.6751	0.5889	0.6393	0.6559	0.577	0.6028
Total PE	3.06	2.76	3.07	3.27	3.78	3.06	3.33	2.63	2.91	3.2	3.57
Total PS	0.43	0.32	0.45	0.4	0.43	0.35	0.41	0.44	0.42	0.36	0.47
High Starch
0.0636	0.0692	0.0698	0.06	0.0539	0.0666	0.0573	0.0676	0.0602	0.0773	0.0617
0.81	0.31	0.34	1.71	0.24	0.55	0.76	4.51	0.85	0.63	0.85
38.23	27.25	16.98	42.35	9.71	35.08	24.96	102.21	123.65	68.43	99.08
9.72	12.07	10.99	11.83	10.82	10.96	11.52	11.23	9.48	11.9	10.31
0.5172	0.7002	0.7064	0.6521	0.5963	0.6413	0.6214	0.6242	0.6597	0.6194	0.576
3.44	3.42	3.12	3.34	2.85	2.84	2.98	3.19	3.72	3.4	3.41
0.35	0.51	0.43	0.44	0.41	0.48	0.4	0.48	0.37	0.38	0.35
High Fat
0.0954	0.0782	0.0614	0.0762	0.1131	0.0692	0.0731	0.0802	0.0566
0.62	0.5	0.79	0.61	0.78	3.96	0.58	0.83	0.96
35.73	40.86	34.88	75.27	75.18	46.97	36.45	85.56	47.52
12.21	9.8	10.74	9.43	11.98	11.37	11.41	12.39	9.94
0.8518	0.6167	0.5745	0.5706	0.8827	0.6771	0.5881	0.6023	0.5567
4.07	3.56	3.41	3.28	3.29	3.5	3.71	4.44	2.59
0.51	0.44	0.37	0.32	0.5	0.44	0.46	0.58	0.38

## Sheet: Figure 6B
Muscl DAG Levels
Chow
DAG 16:0_16:0	0.04	0.07	0	0.11	0.1	0.04	0.01	0.08	0.04	0.21	0.01
DAG 16:0_16:1	0	0.06	0	0	0	0	0	0.1	0.02	0	0.06
DAG 16:0_18:1	0.09	0	0.07	0.06	0.1	0	0	0.13	0.17	0.11	0.11
DAG 16:1_16:1	0.04	0	0.01	0.02	0.05	0	0.02	0.06	0.05	0.01	0.01
DAG 16:1_18:3	0	0	0	0.03	0	0	0.06	0	0	0	0.04
DAG 18:0_18:2	0	0	0.01	0	0.05	0	0.06	0.01	0.07	0	0.06
DAG 18:0_22:6	0	0	0	0	0.21	0	0.2	0.08	0.08	0.4	0.01
DAG 18:1_18:1	0	0	0	0	0.08	0	0.07	0.07	0.19	0	0.12
DAG 18:1_18:2	0	0	0.01	0	0.05	0	0.06	0.03	0.1	0	0.09
High Starch
DAG 16:0_16:0	0.13	0.03	0.09	0.05	0.18	0.07	0.08	0	0.04	0.05
DAG 16:0_16:1	0.02	0.04	0.02	0.31	0.01	0.06	0.15	0.04	0.04	0.04
DAG 16:0_18:1	0.17	0.12	0.1	0.18	0.04	0.14	0.19	0.2	0.2	0.23
DAG 16:1_16:1	0.08	0.02	0.02	0.04	0.01	0.01	0.09	0.04	0.04	0.04
DAG 16:1_18:3	0.03	0.02	0	0.26	0	0.02	0.03	0.05	0.01	0.01
DAG 18:0_18:2	0.02	0	0.02	0.17	0	0.06	0.03	0.08	0.06	0.07
DAG 18:0_22:6	0.18	0.01	0.06	0.03	0	0.01	0.03	0.13	0	0.12
DAG 18:1_18:1	0.14	0.05	0.01	0.45	0	0.11	0.11	0.18	0.17	0.14
DAG 18:1_18:2	0.04	0	0.02	0.23	0	0.08	0.06	0.13	0.08	0.14
High Fat
DAG 16:0_16:0	0.04	0.03	0.05	0.05	0.02	0.05	0.08	0.07
DAG 16:0_16:1	0.05	0.05	0.04	0	0.04	0	0.01	0.05
DAG 16:0_18:1	0.16	0.19	0.19	0.21	0.22	0.17	0.25	0.18
DAG 16:1_16:1	0	0.04	0.07	0	0.03	0.02	0.01	0.06
DAG 16:1_18:3	0.06	0.03	0.11	0	0.05	0	0	0.06
DAG 18:0_18:2	0.06	0.03	0.07	0.04	0.08	0.06	0.04	0.06
DAG 18:0_22:6	0	0	0	0.05	0.04	0	0.08	0.12
DAG 18:1_18:1	0.14	0.09	0.2	0.22	0.19	0.18	0.24	0.26
DAG 18:1_18:2	0.1	0.04	0.07	0.04	0.12	0.1	0.11	0.09

## Sheet: Figure 6C
Muscle Ceramides
Chow
Cer 16:0	0.0011	0.0008	0	0.0006	0.0015	0.0009	0.0017	0.0018	0.0023	0.001	0.0009
Cer 18:0	0.0409	0.0385	0.035	0.0364	0.0446	0.0387	0.0377	0.0545	0.0552	0.0372	0.0325
Cer 18:1	0.0005	0.0012	0.0011	0.0012	0.0014	0.0011	0.0014	0.0025	0.0018	0.0008	0.001
Cer 19:0	0.0024	0.002	0.0026	0.0025	0.0026	0.0025	0.0018	0.003	0.0036	0.0029	0.0026
Cer 22:0	0.0018	0.0016	0.0014	0.0016	0.0024	0.0023	0.0024	0.0025	0.0019	0.0029	0.0024
Cer 23:0	0.0013	0.0012	0.0013	0.0014	0.0019	0.0018	0.0018	0.0021	0.0019	0.0017	0.0018
Cer 24:0	0.0025	0.0014	0.0023	0.002	0.0031	0.001	0.0044	0.0015	0.0037	0.0023	0.0035
Cer 24:1	0.0051	0.0049	0.0049	0.0047	0.0083	0.005	0.0047	0.0112	0.0094	0.0051	0.0053
Cer 24:2	0.0004	0.0009	0.0007	0.0003	0.0005	0.0006	0.0005	0.0013	0.0004	0.0007	0
High Starch
Cer 16:0	0.0012	0.0015	0.0017	0.0011	0.0012	0.0011	0.0014	0.0028	0.0017	0.0021	0.0017
Cer 18:0	0.0473	0.0499	0.0491	0.0404	0.0412	0.0494	0.042	0.0462	0.0402	0.0481	0.0398
Cer 18:1	0.0009	0.0009	0.0013	0.0009	0.0006	0.0012	0.0013	0.0023	0.0002	0.0019	0.0014
Cer 19:0	0.0011	0.0021	0.0018	0.0008	0.0014	0.0015	0.0013	0.0011	0.002	0.0023	0.0017
Cer 22:0	0.002	0.0023	0.0033	0.0032	0.0015	0.0022	0.0024	0.0042	0.0027	0.0038	0.004
Cer 23:0	0.0015	0.0015	0.0016	0.0017	0.0019	0.0015	0.0017	0.0012	0.0024	0.0035	0.0021
Cer 24:0	0.0027	0.0037	0.003	0.0049	0.002	0.0022	0.0019	0.0025	0.0032	0.0066	0.0047
Cer 24:1	0.0062	0.0066	0.0069	0.0064	0.0041	0.0069	0.0055	0.0067	0.0074	0.0079	0.0063
Cer 24:2	0.0007	0.0007	0.0012	0.0006	0	0.0005	0	0.0007	0.0003	0.001	0
High Fat
Cer 16:0	0.0021	0.0022	0.001	0.0015	0.0092	0.0024	0.0018	0.0019	0.0015
Cer 18:0	0.0719	0.0598	0.0452	0.0577	0.0685	0.0528	0.0554	0.0633	0.0423
Cer 18:1	0.0011	0.0009	0.001	0.0008	0.0024	0.0015	0.001	0.0005	0.0009
Cer 19:0	0.0012	0.0005	0.0009	0.0005	0.0011	0.0008	0.0009	0.0009	0.0005
Cer 22:0	0.0031	0.0029	0.0028	0.0029	0.006	0.0021	0.0027	0.0028	0.0021
Cer 23:0	0.0024	0.0016	0.0014	0.0011	0.0026	0.0011	0.0015	0.0018	0.0012
Cer 24:0	0.0036	0.0028	0.0037	0.0051	0.009	0.0016	0.0035	0.0025	0.003
Cer 24:1	0.009	0.007	0.0046	0.0066	0.0122	0.0058	0.0056	0.0062	0.0045
Cer 24:2	0.0012	0.0005	0.0008	0	0.0021	0.0009	0.0009	0.0003	0.0006

## Sheet: Figure 6D
Muscle 18:0 Ceramide vs glucose uptake
glucose Uptake	Chow	High Starch	High fat
17.1886	0.0409
26.2823	0.0385
17.1704	0.035
25.8053	0.0364
24.0246	0.0446
17.8402	0.0387
26.5919	0.0377
20.9509	0.0545
16.7141	0.0552
12.4562	0.0372
20.5406	0.0325
13.0478			0.0719
15.1179			0.0598
21.0022			0.0452
14.5244			0.0577
11.5276			0.0685
8.13284			0.0528
17.7409			0.0554
12.7595			0.0633
11.1498			0.0423
15.4804		0.0473
16.9234		0.0499
22.7472		0.0491
28.2983		0.0404
25.4933		0.0412
16.837		0.0494
20.8688		0.042
10.2916		0.0462
17.0559		0.0402
15.0184		0.0481
15.2405		0.0398

## Sheet: Figure 6E
Liver lipid totals
Chow
Cer	0.129	0.1065	0.1574	0.1345	0.1213	0.1114	0.1201	0.1285	0.1446	0.1274	0.1691
DAG	1.35	1.47	1.2	2.21	1.27	1.47	1.5	0.42	3.06	1.07	1.93
TAG	12.34	8.62	3.23	19.43	12.79	4.58	8.19	5.32	58.4	5	13.35
SM	2.17	1.96	2.32	2.34	1.83	2.02	2.82	2.51	2.82	2.23	2.28
PC	27.73	25.89	26.25	28.73	23.62	23.54	27.4	19.75	23.43	26.69	26.37
PE	11.57	10.32	10.39	12.66	8.37	9.45	9.71	9.36	12.15	10.77	9.54
PS	1.89	1.24	1.69	1.55	1.13	1.27	1.33	1.43	1.68	1.29	1.61
CE	1.64245	1.01698	0.76207	2.30151	3.18421	1.35316	1.08854	2.60384	3.07258	1.19937	2.56827
High starch
Cer	0.1079	0.1542	0.1129	0.1474	0.1157	0.1036	0.1748	0.2091	0.1948	0.1468	0.228
DAG	2.55	4.36	3.52	4.11	1.89	4.13	2.77	2.65	13.18	8.45	11.19
TAG	63.6	62.25	61.01	67.16	21.89	68.14	29.58	89.48	256.29	134.8	153.32
SM	2.15	1.99	1.92	2.29	2.19	1.8	2.69	2.86	1.61	1.91	2.58
PC	26.68	25.89	25.02	28.2	26.75	23.69	30.25	25.16	22.1	23.44	34.93
PE	12.67	11.37	12.33	14.19	12.53	10.79	14.09	12.93	9.98	11.07	13.8
PS	1.81	1.37	1.33	1.53	1.59	1.56	1.46	1.87	1.06	1.32	1.81
CE	5.46472	9.23466	7.53207	5.24865	4.98382	8.32977	6.92383	3.26415	9.37619	16.6698	9.7068
High Fat
Cer	0.2417	0.1828	0.1613	0.1682	0.2416	0.2162	0.0873	0.1573	0.2031
DAG	1.57	3.11	3.24	2.9	8.09	11.92	3.26	3.7	10.79
TAG	46.66	48.11	55.99	71.59	133.2	231.48	37.31	73.07	101.38
SM	2.71	2.24	2.29	2.14	2.43	2.28	1.21	2.27	1.93
PC	30.61	28.73	28.07	25.19	21.41	22.78	16.6	31.03	31.33
PE	15.35	11.7	13.56	12.07	11.19	13.05	6.61	14.49	13.47
PS	2.02	1.59	1.79	1.44	1.83	1.76	0.88	1.74	1.68
CE	3.67258	2.61148	3.63207	3.23471	5.13435	6.2671	2.88272	6.51085	5.84296

## Sheet: Figure 6F
Liver DAG levels
Chow
DAG 16:0_16:0	0.02	0.04	0.03	0.29	0	0	0.24	0	0.1	0.04	0
DAG 16:0_16:1	0	0.01	0.03	0	0	0	0.04	0.01	0.06	0.13	0.02
DAG 16:0_18:1	0.34	0.36	0.41	0.59	0.36	0.34	0.49	0.14	0.49	0.34	0.4
DAG 16:0_18:2	0.28	0.18	0.19	0.19	0.07	0.14	0.21	0.08	0.37	0.16	0.3
DAG 16:0_22:6	0.09	0.04	0.05	0.07	0.05	0	0.1	0.02	0.16	0.03	0.1
DAG 16:1_18:2	0.1	0	0	0.06	0	0.03	0	0	0.07	0.1	0.08
DAG 16:1_18:3	0.01	0	0.04	0	0	0.01	0	0.05	0.05	0.02	0.01
DAG 18:0_18:2	0.06	0.1	0.06	0.14	0.1	0.13	0.03	0	0.32	0.02	0.16
DAG 18:0_20:4	0	0.03	0	0.01	0	0.04	0	0	0.08	0	0.05
DAG 18:1_18:1	0.26	0.36	0.25	0.5	0.43	0.37	0.26	0.09	0.66	0.13	0.33
DAG 18:1_18:2	0.15	0.23	0.09	0.25	0.2	0.27	0.07	0.02	0.51	0.06	0.3
DAG 18:1_20:4	0	0	0.03	0	0	0	0	0	0	0.01	0.01
DAG 18:1_22:6	0.04	0.08	0.02	0.12	0.06	0.12	0.06	0	0.11	0.02	0.14
DAG 18:2_18:2	0	0.04	0	0	0	0.03	0	0	0.08	0	0.04
High Starch
DAG 16:0_16:0	0.08	0.08	0.05	0.04	0	0.02	0.05	0.06	0.3	0.06	0.27
DAG 16:0_16:1	0.01	0.08	0.11	0.14	0.13	0.09	0.08	0.08	0.29	0.24	0.28
DAG 16:0_18:1	0.58	1.17	1.02	1.09	0.39	1.23	0.62	0.74	4.36	2.14	3.46
DAG 16:0_18:2	0.38	0.72	0.42	0.84	0.34	0.45	0.45	0.42	1.62	0.97	1.58
DAG 16:0_22:6	0	0.05	0.01	0.03	0	0	0	0	0.13	0.11	0.11
DAG 16:1_18:2	0.09	0.1	0.12	0.08	0.04	0.06	0.05	0.09	0.31	0.17	0.22
DAG 16:1_18:3	0.04	0.02	0	0	0	0	0.02	0	0.03	0.03	0
DAG 18:0_18:2	0.2	0.36	0.29	0.32	0.19	0.34	0.27	0.18	0.7	0.69	0.7
DAG 18:0_20:4	0.03	0.04	0.04	0.07	0.04	0.01	0.07	0.09	0.06	0.04	0.08
DAG 18:1_18:1	0.65	0.92	0.75	0.62	0.26	1.13	0.5	0.59	3.5	2.22	2.62
DAG 18:1_18:2	0.43	0.72	0.61	0.66	0.42	0.75	0.52	0.33	1.58	1.41	1.52
DAG 18:1_20:4	0	0.02	0.02	0.06	0.03	0	0.02	0.01	0.05	0.13	0.08
DAG 18:1_22:6	0	0	0	0.02	0	0	0	0.01	0.05	0.04	0.02
DAG 18:2_18:2	0.06	0.09	0.07	0.13	0.06	0.05	0.11	0.04	0.22	0.19	0.25
High Fat
DAG 16:0_16:0	0	0.03	0.08	0.05	0.1	0.13	0.01	0.14	0.09
DAG 16:0_16:1	0	0.05	0.08	0.02	0.09	0.11	0	0	0.04
DAG 16:0_18:1	0.43	0.93	0.74	0.8	1.57	2.63	0.79	1.1	2.44
DAG 16:0_18:2	0.25	0.52	0.51	0.59	1.27	2.04	0.6	0.68	1.63
DAG 16:0_22:6	0.07	0.07	0.08	0.06	0.2	0.26	0.1	0.06	0.2
DAG 16:1_18:2	0	0.02	0.03	0.05	0.19	0.28	0.04	0	0.22
DAG 16:1_18:3	0	0	0.04	0.02	0.04	0.05	0.01	0	0
DAG 18:0_18:2	0.11	0.24	0.32	0.23	0.8	1.1	0.27	0.27	0.99
DAG 18:0_20:4	0.04	0.07	0.05	0	0.17	0.08	0.04	0.05	0.1
DAG 18:1_18:1	0.31	0.65	0.53	0.51	1.44	2.22	0.61	0.72	2.41
DAG 18:1_18:2	0.29	0.48	0.58	0.46	1.64	2.32	0.58	0.53	2.03
DAG 18:1_20:4	0.01	0.03	0.05	0.03	0.09	0.13	0.03	0.01	0.13
DAG 18:1_22:6	0	0	0.05	0	0.16	0.15	0.07	0.05	0.19
DAG 18:2_18:2	0.05	0.02	0.12	0.08	0.34	0.42	0.09	0.07	0.31

## Sheet: Figure 6G
Liver Ceramide levels
Chow
Cer 16:0	0.0104	0.0076	0.0097	0.007	0.0097	0.0067	0.0137	0.0157	0.0207	0.0077	0.0097
Cer 18:0	0.0013	0.0011	0.0008	0.0006	0.0016	0.0015	0.0015	0.0022	0.0031	0.0011	0.0018
Cer 20:0	0.0003	0.0013	0.0029	0.0018	0.002	0	0.001	0.0006	0.0002	0.0001	0.0022
Cer 21:0	0.001	0.0009	0.0012	0.0009	0.0003	0.0004	0	0	0.001	0.0008	0.0011
Cer 22:0	0.0168	0.0154	0.0173	0.024	0.0146	0.0115	0.0184	0.0148	0.0174	0.0181	0.0344
Cer 22:1	0.0027	0.0032	0.0027	0.0054	0.0039	0.003	0.0014	0.0008	0.0019	0.0039	0.004
Cer 22:2	0.0026	0.0024	0.0033	0.0023	0.0022	0.0019	0.002	0.0026	0.0023	0.0026	0.0035
Cer 23:0	0.0118	0.0091	0.0158	0.0093	0.01	0.0102	0.0093	0.008	0.0096	0.012	0.0141
Cer 23:1	0.0008	0.0011	0	0.0016	0.0009	0.0007	0.0009	0.0008	0.0012	0.0008	0.0012
Cer 24:0	0.0269	0.018	0.0389	0.0241	0.0197	0.0236	0.0304	0.0244	0.0293	0.0294	0.0346
Cer 24:1	0.0497	0.0428	0.0593	0.0537	0.0493	0.0479	0.0384	0.0526	0.0535	0.0452	0.0586
Cer 24:2	0.0027	0.0021	0.0031	0.0016	0.0044	0.0021	0.0018	0.0059	0.0038	0.0022	0.0018
Cer 25:0	0.002	0.0014	0.0025	0.0022	0.0026	0.0019	0.0015	0.0002	0.0007	0.0034	0.002
High Starch
Cer 16:0	0.0093	0.0129	0.008	0.0106	0.0059	0.0078	0.0094	0.0312	0.0179	0.0109	0.018
Cer 18:0	0.0014	0.0031	0.0017	0.0039	0.0019	0.0008	0.0017	0.0063	0.0121	0.0024	0.0056
Cer 20:0	0.0027	0.0052	0.0024	0.0053	0.0032	0.0019	0.0079	0.0055	0.008	0.0018	0.0081
Cer 21:0	0.0004	0.0008	0.0013	0.0007	0.0013	0.0011	0	0.0004	0	0.0006	0.001
Cer 22:0	0.0229	0.0395	0.0226	0.0357	0.0353	0.0209	0.0488	0.0435	0.0365	0.0254	0.0494
Cer 22:1	0.0065	0.0052	0.0053	0.003	0.0045	0.0044	0.0046	0.003	0.0055	0.0069	0.0072
Cer 22:2	0.0021	0.0026	0.002	0.0031	0.0022	0.0023	0.0027	0.0021	0.0023	0.0028	0.004
Cer 23:0	0.0085	0.0117	0.0094	0.0117	0.0074	0.0077	0.0116	0.0097	0.0141	0.0116	0.0158
Cer 23:1	0.0008	0.0009	0.0019	0.0013	0.0008	0.0011	0.001	0.0007	0	0.0011	0.0011
Cer 24:0	0.0146	0.0266	0.0173	0.0282	0.0204	0.0171	0.035	0.0435	0.0278	0.0234	0.0405
Cer 24:1	0.0347	0.041	0.0371	0.0404	0.0301	0.0349	0.0489	0.0568	0.0659	0.0561	0.0703
Cer 24:2	0.0029	0.0028	0.0024	0.0015	0.0017	0.0024	0.0032	0.0043	0.0033	0.003	0.0044
Cer 25:0	0.0011	0.0021	0.0015	0.0019	0.001	0.0013	0	0.0021	0.0014	0.0009	0.0026
High fat
Cer 16:0	0.017	0.0151	0.0111	0.0191	0.0321	0.0235	0.007	0.0094	0.0155
Cer 18:0	0.008	0.0028	0.0041	0.0048	0.0086	0.007	0.0033	0.0032	0.0048
Cer 20:0	0.0122	0.0078	0.0112	0.009	0.0058	0.0051	0.0026	0.0067	0.0124
Cer 21:0	0.0016	0.0023	0.0009	0.0012	0.0015	0.0012	0.001	0.0007	0.0009
Cer 22:0	0.0766	0.0527	0.0577	0.052	0.0362	0.0475	0.0203	0.0486	0.0596
Cer 22:1	0.0061	0.0057	0.0031	0.005	0.002	0.0023	0.0012	0.0041	0.0058
Cer 22:2	0.0039	0.0022	0.0022	0.0017	0.0029	0.0023	0.0013	0.0015	0.0028
Cer 23:0	0.0175	0.0116	0.0093	0.0093	0.011	0.0095	0.0062	0.0106	0.0134
Cer 23:1	0.0017	0.0013	0.0001	0.0005	0.0019	0.0006	0	0.0013	0.0015
Cer 24:0	0.0331	0.0256	0.0231	0.0246	0.0482	0.0413	0.0181	0.0265	0.0267
Cer 24:1	0.0584	0.0509	0.0343	0.0363	0.078	0.0673	0.0239	0.0413	0.0529
Cer 24:2	0.004	0.0037	0.0023	0.0028	0.0092	0.0067	0.0014	0.0021	0.0044
Cer 25:0	0.0017	0.0011	0.0019	0.0018	0.0042	0.0017	0.0008	0.0013	0.0023

## Sheet: Figure 6H
Liver Cer22:0 vs % supp HGO
HGO	cer 22:0	Hi-ST	Hi-F
81.9898	0.0168
76.5193	0.0154
130.799	0.0173
70.7276	0.024
99.9636	0.0146
70.092	0.0115
121.011	0.0184
69.0032	0.0148
61.5343	0.0174
83.1895	0.0181
45.0035	0.0344
62.6068			0.0766
27.7424			0.0527
44.3812			0.0577
46.6333			0.052
54.2964			0.0475
34.3642			0.0203
17.474			0.0486
15.7461			0.0596
79.8558		0.0229
60.5858		0.0395
42.4942		0.0226
45.2676		0.0357
68.8714		0.0353
51.3266		0.0209
125.789		0.0488
112.052		0.0435
19.1642		0.0365
25.8651		0.0254
24.9432		0.0494
