# Supplementary material for: Insulin sensitivity is preserved in mice made obese by feeding a high starch diet
Source: eLife. 2022 Nov 17;11:e79250. doi: 10.7554/eLife.79250 (PMC9711519; doi:10.7554/eLife.79250)
Supplement: Source data 1. [file elife-79250-data1.xlsx]

## Sheet: Supp Table 2
Muscle metabolomics
Chow
Glucose	0.789907	0.499504	0.580314	0.553903	0.772039	0.671133	0.676743	2.14967	2.30678
Lactate	0.743454	0.971728	0.761571	1.06859	0.941753	0.831606	0.943044	1.31986	1.41839
E4P	0.967019	0.469988	1.06493	1.02998	1.0097	1.11469	1.09769	1.00488	1.24111
G6P	0.967097	0.46653	1.04736	0.997488	1.00421	1.0592	1.14857	1.05311	1.25644
GAP	0.757708	1.64955	0.864853	0.843716	0.989515	0.95492	1.08515	1.52621	0.328369
R5P	0.342148	2.00723	0.600405	0.943551	0.612338	0.305954	1.49981	1.49693	1.19163
S7P	0.540323	1.06436	0.643608	0.918322	0.62688	0.744733	1.36014	1.64307	1.45857
F6P	0.902403	0.245766	0.28921	0.546026	0.54287	3.10504		0.299689	2.069
G1P	1.08895	0.267788	0.859823	0.652438	0.369168	1.77725	1.21146	1.09624	1.67688
DHAP	0.707748	1.19983	1.05219	0.813404	0.595106	0.97476	1.34138	1.34142	0.974161
RU5P	0.1058	2.02266	0.723307	0.702412	0.275819	0.440439	2.0239	1.9069	0.798758
NAD	1.02491	0.825055	1.12858	1.16259	1.15786	0.998618	1.03243	0.785808	0.884146
Pyruvate	0.835315	0.905448	1.04272	0.792567	0.937629	0.969618	1.10065	1.36318	1.05287
Succinate	1.04042	0.601614	0.483344	1.45767	1.27197	0.84558	0.764941	1.25926	1.2752
a-KG	0.776393	0.442518	0.420844	1.26642	2.98815	1.66977	0.462362	0.381877	0.591659
Malate	0.925324	0.840956	0.948719	1.81728	1.47542	0.810325	0.759903	0.725206	0.696869
UDP-GLC	1.15477	0.894893	1.23012	0.898804	1.21748	1.10602	0.773602	0.927854	0.796455
NADP	0.955152	0.807226	1.09161	1.00219	0.961411	1.01472	0.9028	1.1975	1.0674
6PG	0.694692	0.954754	0.939204	1.46794	1.10434	0.766934	0.935273	1.34794	0.788921
Fumarate	0.934322	0.821455	0.663372	1.39569	1.65543	0.460685	1.24583	0.457266	1.36594
3PG	1.64647	0.269322	1.0002	0.619225	1.22705	2.13901	0.728275	0.648229	0.722221
FBP	0.914752	0.637137	1.41309	0.968888	0.841524	0.77933	1.27175	1.2122	0.961331
NADH	1.25466	1.6358	0.882077	0.627052	0.610704	1.22839	0.88175	0.977982	0.901584
Citrate	0.762009	0.841721	0.8287	1.82066	1.68818	0.680371	0.878602	0.742176	0.757586
PEP	1.31836	1.09657	1.14379	0.866833	0.947996	1.13856	0.938922	0.774967	0.774007
NADPH	1.0033	1.0851	1.02126	0.978977	0.991772	0.819671	1.13085	1.01487	0.95421
Acetyl-CoA	1.2183	1.16306	0.760292	1.28921	0.81874	0.661013	0.966379	0.969184	1.15382
High starch
Glucose	0.445394	0.615565	1.26908	0.599278	0.605006	0.839317	0.606128	2.25947	1.45053	3.34538
Lactate	0.756346	1.07122	1.45306	1.42697	0.999066	1.25751	1.05519	1.17947	1.07461	1.38685
E4P	0.460793	0.610509	1.14829	0.669923	0.781009	0.992163	1.16368	0.790958	1.00593	1.26305
G6P	0.486157	0.635187	1.1076	0.702914	0.781683	0.924448	1.16336	0.939966	1.04102	1.30476
GAP	2.72344	1.06421	7.65749	5.62208	2.6373	1.35376	0.822749	2.84966	0.657712	5.88228
R5P	1.79227	0.530292	4.17727	1.14287	1.36626	0.787133	0.524596	2.64877	0.954953	3.07224
S7P	0.894972	0.623165	1.4773	0.704419	0.738255	0.73177	0.793871	1.96434	1.2338	1.45738
F6P	0.485507	0.0144075	1.04775			0.465384	1.86181	0.708746	1.84876	1.79609
G1P	0.351775	0.345757	0.684315	0.367861	0.750043	0.736626	1.87171	0.760918	1.32113	1.62566
DHAP	1.61965	0.90145	4.23111	3.28685	2.06109	1.1683	0.533996	1.84223	0.855837	3.74135
RU5P	1.92266	0.253032	4.88466	1.07075	1.79661	1.06388	0.212874	2.79832	0.789948	4.99016
NAD	0.848078	0.963952	0.667426	0.889236	0.988421	0.917307	1.12762	0.862045	0.911632	0.895185
Pyruvate	1.06124	0.739512	2.14436	0.952335	1.39495	1.43047	0.813107	1.33463	1.43333	1.8936
Succinate	1.33702	2.09931	1.24033	2.62429	1.48205	1.38248	1.76556	1.42573	0.800497	1.73024
a-KG	0.438752	0.619038	0.612637	0.323219	0.44635	0.470807	1.27622	0.360513	0.297138	0.365627
Malate	0.891314	0.939104	0.665553	1.08183	0.845071	0.803909	1.04796	0.733558	0.700776	0.887969
UDP-GLC	1.03218	0.986686	0.924584	0.942846	1.27516	1.01565	1.16236	1.18045	0.978619	1.21964
NADP	1.00457	0.837219	0.92554	0.996035	1.16136	1.01735	1.06772	1.26468	0.892736	1.13042
6PG	1.38865	1.54785	1.65733	0.881815	1.23349	0.603944	1.11895	2.22743	0.947494	2.56278
Fumarate	1.0746	0.735421	0.562299	1.38583	2.1553	0.858807	0.54469	0.94267	0.594762	1.98683
3PG	0.547976	0.770081	0.441991	0.811116	0.705372	0.66316	1.18573	0.459371	0.967812	0.603805
FBP	0.785679	0.89808	1.78996	3.38803	1.27129	0.982295	0.71778	1.0054	0.893664	1.59045
NADH	2.59579	1.0177	2.78925	1.62498	1.85589	0.943444	1.18482	1.42236	1.12848	2.32925
Citrate	0.930103	0.762685	0.884565	0.683352	0.889998	0.879718	0.647128	0.739254	0.590132	0.736797
PEP	0.989654	0.86575	0.999286	0.798868	1.15705	0.882578	0.833301	0.680718	0.698934	0.795485
NADPH	1.11443	0.864677	0.962631	1.05712	1.08538	0.834291	1.05165	1.17559	0.923238	1.25774
Acetyl-CoA	0.581099	0.899932	0.713353	0.552192	0.976615	0.703592	0.918927	1.84189	1.02226	1.72796
High fat
Glucose	1.35127	0.394972	1.34278	1.17841	2.31489	1.0792	1.06218	2.73214
Lactate	2.24694	1.57278	1.2854	0.868468	1.5524	1.06425	0.838577	0.896103
E4P	1.32908	0.82337	0.944776	0.812939	0.649908	1.13451	0.576319	0.706354
G6P	1.21172	0.844447	1.01	0.85328	0.794548	1.23479	0.608969	0.771315
GAP	2.65176	0.379001	1.19101	1.32673	17.4521	3.0792	7.43668	2.91885
R5P	2.93181	0.887732	0.719332	0.932276	2.23681	2.83969	2.46934	2.86925
S7P	1.69016	0.737882	0.593885	0.777267	1.3156	1.37371	1.38748	1.72949
F6P	0.85159	0.333679	0.538783	0.847323		1.67693		0.756259
G1P	0.859192	0.372612	0.707598	0.899156		1.9259	0.542477	0.593561
DHAP	2.28962	0.618773	1.38355	1.1646	8.54701	2.2648	3.5719	1.7727
RU5P	2.8603	0.186482	0.847092	0.887075	2.27748	3.05462	3.21225	3.05425
NAD	0.802051	0.877193	0.965545	0.953779	0.590988	0.778644	0.554166	0.696466
Pyruvate	1.89757	1.00558	1.37682	0.728539	1.21976	2.26757	0.97319	1.23394
Succinate	1.55291	1.85352	2.62816	2.80997	3.16028	1.22438	1.21446	0.667838
a-KG	0.656731	0.531598	0.436893	0.361778	0.360513	0.363052	0.380468	0.380468
Malate	0.557238	0.80532	0.840609	1.07285	0.790742	0.93076	0.654699	0.885675
UDP-GLC	0.759723	0.813827	0.757759	0.982243	0.974871	1.10429	0.61459	1.10412
NADP	0.87618	0.86282	0.903415	1.0641	1.26851	1.15664	0.877001	1.16045
6PG	0.420628	1.42924	1.02021	2.0683	1.69878	2.32798	2.0946	1.98981
Fumarate	0.875287	0.916592	0.835245	1.96136	1.38251	2.63218	2.28718	0.438542
3PG	0.534113	0.500537	0.797503	0.79625	0.788395	0.862569	0.133373	0.539338
FBP	1.11859	0.693327	1.15272	1.08073	6.87567	1.01962	1.22249	0.672143
NADH	0.599406	0.600991	0.941109	1.55492	3.76183	1.83245	2.84542	2.30637
Citrate	1.06458	0.753884	1.92365	0.762355	0.775173	1.60987	0.682081	0.756482
PEP	1.30209	0.779719	0.960675	0.769189	0.986546	0.895567	0.606114	0.815899
NADPH	1.01981	0.716905	0.886462	0.970457	1.02703	1.2031	0.830395	0.996022
Acetyl-CoA	0.787164	0.176542	0.353587	0.578305	0.507468	1.37067	0.729936	1.13697
