# Supplementary material for: Insulin sensitivity is preserved in mice made obese by feeding a high starch diet
Source: eLife. 2022 Nov 17;11:e79250. doi: 10.7554/eLife.79250 (PMC9711519; doi:10.7554/eLife.79250)
Supplement: Source data 2. [file elife-79250-data2.xlsx]

## Sheet: Supp Table 3
iver Metabolomics
Chow
Glucose	1.01661	1.01059	0.738707	0.937278	0.715149	1.32235	0.709224	1.46592	1.08418
Lactate	1.08404	1.11563	1.02445	0.840181	0.587022	0.998743	1.4271	0.90982	1.013
E4P	0.99829	1.01268	0.958582	0.990222	0.692405	1.1047	0.867431	1.51995	0.855737
G6P	1.02403	0.938127	0.871147	1.01183	0.763783	1.20299	0.780789	1.49171	0.915582
GAP	0.844226	1.12797	1.83287	0.619571	0.862178	0.96572	0.73199	0.915805	1.09967
R5P	1.05525	0.977899	1.61272	0.304632	0.288644	1.05317	0.673656	1.70535	1.32868
S7P	0.852587	1.13621	0.883437	1.18927	0.668653	1.05762	0.657622	1.76161	0.79299
F6P	1.48591		1.84836	0.349809		0.821912	0.327493	1.22988	0.936634
G1P	1.49944	0.574099	1.34056	1.08089	0.618038	0.763782	0.344149	1.5803	1.19874
DHAP	0.917856	0.984268	1.48256	0.816298	0.811549	1.1897	1.05825	0.822105	0.917416
RU5P	0.946009	0.593229	0.97857		0.198383	0.784543	1.91711	1.76949	0.812657
NAD	1.19733	0.931018	1.36017	1.0098	0.847908	0.956943	0.407366	1.12918	1.16029
Pyruvate	1.41473	0.756718	0.843443	0.675465	0.757473	1.07578	1.4398	1.10867	0.927922
Succinate	1.22021	0.911529	0.877531	0.798382	0.745047	1.06317	1.18558	1.09808	1.10047
a-KG	0.368918	0.482948	0.377303	1.81296	2.71505	0.854594	0.466002	1.50995	0.412281
Malate	1.16798	0.89176	0.835821	0.87542	0.733365	1.36494	1.16755	1.21489	0.748267
UDP-GLC	0.785714	1.08972	0.779835	0.798132	0.797728	1.21973	0.71269	1.8066	1.00986
NADP	1.35444	0.94622	1.00764	0.688755	0.585932	1.02248	0.974136	1.37442	1.04598
6PG	1.7875	0.999171	1.23229	1.05646	0.552747	0.835328	0.663552	1.22586	0.647103
Fumarate	1.41742	0.746494	1.02931	0.980223	0.523226	1.05051	1.25288	1.06263	0.937309
3PG	1.24128	0.828799	1.39773	0.587139	1.17392	0.978902	0.617564	1.25327	0.921402
FBP	1.10111	0.996244	0.949779	0.52591	0.403342	1.07031	1.93787	1.05375	0.961679
NADH	1.26013	1.10672	1.32458	0.982593	0.526925	1.29231	0.617284	0.842358	1.0471
Citrate	1.15906	0.55822	0.475686	1.37174	0.627719	1.34255	1.33085	1.13777	0.996406
PEP	1.25315	0.783641	1.353	0.61467	1.28487	0.971522	0.611197	1.1981	0.929857
NADPH	1.15336	0.960802	1.1417	0.828091	0.785096	0.800469	1.15399	0.882609	1.29389
Acetyl-CoA	0.96943	1.2221	0.957136	1.3313	0.816328	1.25397	1.28021	0.476479	0.693047
High starch
Glucose	0.783472	1.13191	1.1066	1.36291	1.18207	1.03194	1.44885	0.73848	0.476215	0.589131
Lactate	1.01301	0.69501	1.14933	1.15012	0.933227	1.2436	0.853257	0.318859	0.331616	0.138013
E4P	0.901185	1.10458	1.16388	1.29614	1.00591	1.21123	0.961564	0.877952	0.526033	0.816256
G6P	0.906023	1.1424	1.26196	1.26254	0.922055	1.1342	1.07021	0.947642	0.458054	0.741529
GAP	0.292325	0.638993	1.88332	1.18608	0.40071	0.953879	1.29857	1.08422	0.395816	0.237375
R5P	0.547674	0.513692	2.58051	1.8357	1.13268	1.26941	1.92074	1.02867	0.525064	0.45784
S7P	1.02663	1.48697	1.20263	1.26754	1.25022	0.937566	1.60281	1.1749	0.903512	0.911594
F6P	2.51402	0.761789	0.985123		0.691579	0.454937			0.918089
G1P	0.962231	1.30868	0.520727	0.879728	0.973725	0.231315	0.919423	1.50606	0.629466	0.954068
DHAP	0.339537	0.759486	1.32405	1.14057	0.600742	0.938505	1.11236	1.20605	0.452278	0.191125
RU5P	0.5987	-0.0039584	1.77235	1.52567	1.48774	1.50394	1.80951	0.918	1.33109	0.528382
NAD	1.1262	0.917382	0.880236	0.957419	1.00991	0.730398	0.747259	0.738996	0.553424	1.03278
Pyruvate	1.55319	0.540066	1.07877	0.792007	1.16914	1.02998	0.820454	0.174753	1.25002	0.479713
Succinate	0.941391	1.10467	1.06791	1.32477	1.14185	1.2242	1.07387	0.802553	0.599325	0.565623
a-KG	0.316216	1.48145	0.43977	0.469296	0.380546	0.412455	0.504983	2.54594	3.47894	1.14289
Malate	0.986136	1.16813	1.42384	1.26203	0.925555	1.1653	1.14503	0.88632	1.20307	0.808834
UDP-GLC	1.07123	0.859501	1.21221	0.690666	0.941043	1.11314	1.17524	0.729184	0.528592	0.957329
NADP	0.724005	0.61316	1.37462	1.25281	1.29126	1.18039	1.14828	0.665784	0.506254	0.548798
6PG	0.423339	0.631863	1.63598	1.19068	0.774924	1.48344	0.646949	0.684374	0.344743	0.398574
Fumarate	0.835587	0.982955	1.24258	1.81196	1.59871	0.847872	0.689048	0.363539	0.497095	0.397515
3PG	0.834527	0.73739	1.30608	0.958755	0.968566	0.823339	0.846837	1.03812	0.51815	0.504205
FBP	0.905365	0.482016	1.58796	1.20115	1.02327	1.05866	1.35229	0.651247	0.934732	0.754733
NADH	0.716144	1.02217	1.2828	1.44297	0.733662	0.966019	1.17038	0.472725	0.210769	0.761069
Citrate	0.873081	1.32509	1.33109	1.32201	1.19394	1.21921	1.44648	1.39338	1.41188	1.17506
PEP	0.847937	0.789625	1.31514	0.974388	1.01508	0.750303	0.826896	0.667708	0.535192	0.518384
NADPH	0.694781	0.696318	1.12868	0.915647	1.22521	1.16853	1.09928	0.616239	0.672405	0.585799
Acetyl-CoA	0.442075	0.954268	0.813639	1.33139	0.838531	0.945795	0.875219	0.945598	0.589159	0.197031
High Fat
Glucose	0.597476	0.9696	0.728468	1.48764	0.644954	0.549117	0.723438	0.77513
Lactate	0.491272	1.34825	0.933027	0.956008	0.854922	0.540557	0.419577	0.366801
E4P	0.0634243	0.916142	0.713861	2.01588	0.185835	0.55906	0.858177	1.01067
G6P	0.253168	0.995643	0.786527	1.86739	0.293062	0.527893	0.929636	1.06414
GAP	0.970467	1.00684	0.736565	1.60808	0.683764	0.909852	0.339047	0.107843
R5P	1.62487	1.35924	0.782728	1.93975	0.504461	0.494686	0.344544	0.654178
S7P	0.696771	0.801517	0.663189	1.40823	1.21738	0.750103	0.952561	1.18765
F6P	0.0724293		1.27286	2.90613	1.1486	0.2987	3.42693	4.88147
G1P	0.208096	1.17636	0.765291	2.11019	0.339379	0.849551	0.257435	1.3467
DHAP	0.378837	1.27122	0.622113	1.4467	0.422767	0.584253	0.317531	0.164664
RU5P	1.53797	1.38894	0.662683	1.07424	1.58916	0.946772	0.207535	0.232915
NAD	1.25898	0.804187	1.23584	0.700737	0.253649	1.26592	1.03072	0.905301
Pyruvate	1.18564	1.21221	1.302	1.02491	1.63136	2.16778	0.713282	0.667016
Succinate	1.31624	1.27755	1.19651	1.46432	1.40203	0.974427	0.956561	1.21382
a-KG	0.454831	0.417644	0.590356	2.12152	0.548804	9.74161	2.6096	0.749553
Malate	1.64485	1.18272	1.17048	1.08804	2.92447	2.34891	1.51309	0.971908
UDP-GLC	0.323278	1.07779	0.737977	0.509836	0.372202	1.34925	1.08395	0.49475
NADP	1.332	0.854267	1.1402	0.834911	0.589061	0.882518	0.564968	0.723481
6PG	0.332159	0.770859	0.636658	0.891676	0.288494	0.288235	0.284654	0.366495
Fumarate	2.44678	0.752293	1.25594	1.43656	2.54098	1.848	0.938726	0.917709
3PG	0.98917	1.02635	1.25922	0.400427	0.151722	1.56712	0.943321	0.616833
FBP	0.260508	1.02381	0.613467	1.01985	2.73019	0.975378	0.911422	0.567454
NADH	1.99165	1.13683	0.957284	1.50826	0.98408	0.0844751	0.577638	0.997058
Citrate	1.2056	1.1307	1.20104	1.48971	1.59163	1.75693	1.41613	1.09959
PEP	0.930841	1.01526	1.36321	0.47735	0.250695	1.70997	0.981821	0.63457
NADPH	0.271679	1.03348	1.33374	0.71918	0.271564	0.86255	0.566174	0.35143
Acetyl-CoA	0.910569	0.669448	0.522507	1.4262	0.413087	0.334689	0.197111	0.369946
