# Supplementary material for: Insulin sensitivity is preserved in mice made obese by feeding a high starch diet
Source: eLife. 2022 Nov 17;11:e79250. doi: 10.7554/eLife.79250 (PMC9711519; doi:10.7554/eLife.79250)
Supplement: Table 1—source data 1. [file elife-79250-table1-data1.xlsx]

## Sheet: Liver
Table 1
LIVER
Chow
citrate synthase	132.722	131.584	99.9995	135.913	90.1256	122.563	118.21	85.1725	80.9052
BHAD	118.588	116.014	103.783	108.994	85.8283	106.111	106.327	86.7529	71.4318
Succinate dehydrogenase	16.4606	16.3845	14.178	14.9549	11.1759	14.6691	14.3092	12.1555	12.1793
Pyruvate dehydrogenase	0.647632	1.02449	1.58864	0.270174	0.241375	1.36697	1.98045	0.567117	0.413705
High Starch
citrate synthase	138.613	135.997	138.795	139.418	158.343	136.07	129.282	144.38
BHAD	113.74	118.435	126.652	122.402	107.37	114.124	119.629	113.432
Succinate dehydrogenase	15.6906	15.5995	15.2372	13.2173	16.0626	13.9564	16.2575	15.0116
Pyruvate dehydrogenase	0.261164	0.411523	0.840628	0.182204	0.275672	0.369871	0.496841	2.96461
High Fat
citrate synthase	128.113	119.045	110.07	148.484	126.42	101.505	105.691
BHAD	142.113	133.895	117.196	147.238	109.109	97.3569	111.731
Succinate dehydrogenase	14.7248	13.804	13.1497	18.1645	18.3659	9.70728	17.5128
Pyruvate dehydrogenase	0.479166	0.430531	0.191299	0.524263	0.558217	0.269415	0.0418888

## Sheet: Muscle
Table 1
MUSCLE
Chow
citrate synthase	190.778	167.253	195.922	218.668	186.238	180.592	193.672	162.962	202.001
BHAD	24.0032	18.9106	23.2708	29.6021	25.2897	24.6217	24.5687	17.6516	26.949
Succinate dehydrogenase	2.69082	2.2844	2.40293	3.24291	2.94563	2.46856	2.96944	2.13493	3.2726
Pyruvate dehydrogenase	0.838148	0.793632	0.506981	0.507949	0.361045	0.241026	0.444653	0.14898	0.175865	0.586048
High Starch
citrate synthase	202.807	198.842	218.511	201.355	209.762	205.903	184.614	241.917
BHAD	26.7143	28.2994	31.3533	27.7972	29.9903	26.7129	21.354	34.9249
Succinate dehydrogenase	3.16389	2.25209	3.12366	2.64449	2.51506	2.45493	2.38917	2.83755
Pyruvate dehydrogenase	0.146004	0.382822	1.10962	0.265825	0.157387	0.310241	0.251999	0.181315	0.133824
High Fat
citrate synthase	221.261	208.917	210.133	230.498	232.476	228.911	229.262
BHAD	35.021	34.0703	31.1729	36.2646	32.8993	40.0796	38.4335
Succinate dehydrogenase	2.38334	1.88002	1.92425	2.9415	2.84067	2.96717	2.57682
Pyruvate dehydrogenase	0.395545	0.152319	0.134755	0.145172	0.060833	0.0705515	0.0355462	0.175684
